# Supplementary material for: Organocatalyzed enantioselective one-pot three-component access to indoloquinolizidines by a Michael addition–Pictet–Spengler sequence
Source: Royal Society of Chemistry journal article supplement (doi:10.1039/c001512a), 2010-01-01
Supplement: c001512a.pdf [file c001512a.pdf]

## Supporting Information for

# Organocatalyzed enantioselective one-pot three-component access to indoloquinolizidines by a Michael addition-Pictet-Spengler sequence

Xiaoyu Wu, <sup>\*a</sup> Xiaoyang Dai, <sup>a</sup> Linlin Nie, <sup>a</sup> Huihui Fang, <sup>a</sup> Jie Chen, <sup>a</sup> Zhongjiao Ren, <sup>a</sup>

Weiguo Cao, <sup>\*a</sup> and Gang Zhao <sup>\*b</sup>

<sup>a</sup> Department of Chemistry, Shanghai University, 99 Shangda Rd, Shanghai 200444, People's Republic of China, Fax: (+86)-21-6683-4856; e-mail: wuxy@shu.edu.cn; wgcao@mail.shu.edu.cn

<sup>b</sup> Key Laboratory of Synthetic Chemistry of Natural Substances, Shanghai Institute of Organic Chemistry, Chinese Academy of Sciences, 354 Fenglin Lu, Shanghai 200032, People's Republic of China, Fax: (+86)-21-6416-6128; e-mail: zhaog@mail.sioc.ac.cn

**General Information:** Thin-layer chromatography (TLC) carried out on 0.25 mm silica gel plates visualized with UV light and/or by staining with ethanolic phosphomolybdic acid (PMA) or iodine. Flash column chromatography was performed on silica gel H (10-40  $\mu$ ). NMR spectra were recorded on Bruker AM500 (500MHz). Chemical shifts ( $\delta$ ) are given in ppm relative to TMS, coupling constants ( $J$ ) in Hz. Optical rotations were taken on JASCO P1030. High-resolution mass spectra were recorded on Bruker ApeXIII 7.0 TESLA FTMS. Enantiomeric excesses were determined by chiral HPLC using a Waters instrument.

### General Procedure for Multicatalytic Cascade Michael/Benzoin Reaction:

**Step 1:** To a mixture of catalyst **A** or **B** (0.01 mmol) and benzoic acid (0.01 mmol) in toluene (0.2 mL) was added  $\beta$ -ketone ester (0.1 mmol) under an atmosphere of N<sub>2</sub>. Followed by the addition of  $\alpha,\beta$ -unsaturated aldehyde (0.2 mmol). The reaction was followed by TLC. **Step 2:** After full conversion of  $\beta$ -ketone ester, the reaction mixture was diluted with toluene (2 mL). Then tryptamine (0.2 mmol) and benzoic acid (0.2 mmol) was added. The reaction mixture was heated at 50 °C for 12-24h. The reaction mixture was diluted with EA (20 mL) and washed with saturated NaHCO<sub>3</sub> (10 mL), brine (10 mL) sequentially. The organic layer was dried over Na<sub>2</sub>SO<sub>4</sub> and concentrated in vacuo to afford a crude product which was purified by flash silica gel chromatography.

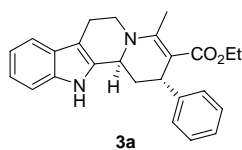

(2*S*,12*bS*)-Ethyl

4-methyl-2-phenyl-1,2,6,7,12,12*b*-hexahydroindolo[2,3*a*]quinolizine-3-carboxylate (**3a**):

The reaction was carried out at -15 °C for 12h using **A** as catalyst (step 1) and stirred for 12h at 50 °C (step 2), the title product was isolated as a white powder (78% yield, 92% ee):

<sup>1</sup>H NMR (CDCl<sub>3</sub>, 500M):  $\delta$  7.67 (s, 1H), 7.48 (d,  $J$  = 7.5 Hz, 1H), 7.30-7.35 (m, 2H), 7.23-7.28 (m, 3H), 7.20 (t,  $J$  = 7.5 Hz, 1H), 7.05-7.16 (m, 2H), 4.25-4.40 (m, 3H), 3.90-4.00 (m, 2H), 3.14-3.24 (m, 1H), 2.82-2.91 (m, 1H), 2.73-2.80 (m, 1H), 2.66 (s, 3H), 2.29 (dt,  $J$  = 12.5 Hz and 3.5 Hz, 1H), 2.07 (td,  $J$  = 12.5 Hz and 5 Hz, 1H), 0.99 (t,  $J$  = 7.5 Hz, 3H).

<sup>13</sup>C NMR (CDCl<sub>3</sub>, 125M):  $\delta$  169.1, 154.9, 147.1, 136.1, 134.1, 128.3, 127.9, 126.8, 126.0, 121.7,

119.6, 118.0, 110.9, 109.1, 96.8, 58.9, 49.6, 44.8, 38.1, 36.0, 22.4, 17.6, 14.3.

$[\alpha]_D^{25}$  140.0 ( $c$  0.70,  $\text{CHCl}_3$ ).

HRMS (ESI) calcd. for  $(\text{C}_{25}\text{H}_{27}\text{N}_2\text{O}_2)^+$  387.2064, found 387.2067.

HPLC (Daicel Chiralpak ADH, Hexane : Isopropanol = 4 : 1, Flow rate = 0.7 mL/min,  $\lambda$  = 220 nm):  $t_R$  = 10.77 min (minor enantiomer),  $t_R$  = 28.06 min (major enantiomer).

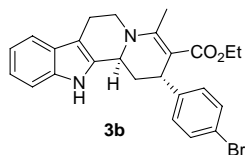

(2*S*,12*bS*)-ethyl

2-(4-bromophenyl)-4-methyl-1,2,6,7,12,12*b*-hexahydroindolo[2,3*a*]quinolizine-3-carboxylate (**3b**):

The reaction was carried out at -15 °C for 24h using **A** as catalyst (step 1) and stirred for 20h at 50 °C (step 2), the title product was isolated as a yellow solid (76% yield, 93% ee):

$^1\text{H}$  NMR ( $\text{CDCl}_3$ , 500M):  $\delta$  7.75 (s, 1H), 7.48 (d,  $J$  = 7.5 Hz, 1H), 7.40-7.45 (m, 2H), 7.24-7.28 (m, 2H), 7.05-7.16 (m, 5H), 4.31-4.36 (m, 1H), 4.22-4.28 (m, 2H), 3.90-3.98 (m, 2H), 3.14-3.22 (m, 1H), 2.82-2.90 (m, 1H), 2.74-2.80 (m, 1H), 2.65 (s, 3H), 2.26 (ddd,  $J$  = 13 Hz 3.5 Hz and 2.5 Hz, 1H), 2.07 (td,  $J$  = 13 Hz and 4.5 Hz, 1H), 1.01 (t,  $J$  = 7 Hz, 3H).

$^{13}\text{C}$  NMR ( $\text{CDCl}_3$ , 125M):  $\delta$  168.9, 155.2, 146.3, 136.2, 133.8, 131.4, 129.7, 122.0, 119.8, 118.2, 111.0, 109.3, 96.4, 59.1, 49.6, 44.9, 37.9, 36.0, 22.5, 17.6, 14.4.

$[\alpha]_D^{25}$  183.4 ( $c$  0.65,  $\text{CHCl}_3$ ).

HRMS (ESI) calcd. for  $(\text{C}_{25}\text{H}_{26}\text{N}_2\text{O}_2\text{Br})^+$  465.1194, found 465.1172.

HPLC (Daicel Chiralpak ADH, Hexane : Isopropanol = 4 : 1, Flow rate = 0.7 mL/min,  $\lambda$  = 220 nm):  $t_R$  = 7.82 min (minor enantiomer),  $t_R$  = 30.76 min (major enantiomer).

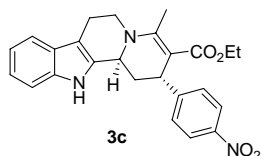

(2*S*,12*bS*)-ethyl

4-methyl-2-(4-nitrophenyl)-1,2,6,7,12,12*b*-hexahydroindolo[2,3*a*]quinolizine-3-carboxylate (**3c**):

The reaction was carried out at 10 °C for 48h using **B** as catalyst (step 1) and stirred for 24h at 50 °C (step 2), the title product was isolated as a yellow solid (91% yield, 93% ee):

$^1\text{H}$  NMR ( $\text{CDCl}_3$ , 500M):  $\delta$  8.15 (d,  $J$  = 3.5 Hz, 2H), 7.85 (s, 1H), 7.48 (d,  $J$  = 7.5 Hz, 1H), 7.42 (d,  $J$  = 8.5 Hz, 2H), 7.27 (d,  $J$  = 8 Hz, 1H), 7.08-7.18 (m, 2H), 4.35-4.42 (m, 2H), 4.26 (d,  $J$  = 7 Hz, 1H), 3.90-3.97 (m, 2H), 3.18-3.26 (m, 1H), 2.76 -2.94 (m, 2H), 2.70 (s, 3H), 2.31-2.38 (m, 1H), 2.15 (td,  $J$  = 12.5 Hz and 5.5 Hz, 1H), 0.98 (t,  $J$  = 7 Hz, 3H).

$^{13}\text{C}$  NMR ( $\text{CDCl}_3$ , 125M):  $\delta$  168.6, 155.8, 155.4, 146.5, 136.3, 133.3, 129.2, 128.8, 126.8, 124.5, 123.7, 122.2, 119.9, 118.3, 111.1, 109.5, 95.6, 59.2, 49.6, 45.0, 38.6, 35.8, 22.4, 17.6, 14.4.

$[\alpha]_D^{25}$  96.0 ( $c$  0.33,  $\text{CHCl}_3$ ).

HRMS (ESI) calcd. for  $(\text{C}_{25}\text{H}_{26}\text{N}_3\text{O}_4)^+$  432.1909, found 432.1918.

HPLC (Daicel Chiralpak ADH, Hexane : Isopropanol = 4 : 1, Flow rate = 0.7 mL/min,  $\lambda$  = 220 nm):  $t_R$  = 16.18 min (minor enantiomer),  $t_R$  = 45.13 min (major enantiomer).

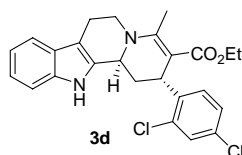

(2*R*,12*bS*)-Ethyl

2-(2,4-dichlorophenyl)-4-methyl-1,2,6,7,12,12*b*-hexahydroindolo[2,3*α*]quinolizine-3-carboxylate (**3d**): The reaction was carried out at 10 °C for 48h using **B** as catalyst (step 1) and stirred for 24h at 50 °C (step 2), the title product was isolated as a yellow solid (86% yield, 95% ee):

<sup>1</sup>H NMR (CDCl<sub>3</sub>, 500M): δ 7.73 (s, 1H), 7.83 (d, *J* = 7.5 Hz, 1H), 7.42 (d, *J* = 2 Hz, 1H), 7.26-7.29 (m, 1H), 7.07-7.19 (m, 4H), 4.65 (d, *J* = 4.5 Hz, 1H), 4.36 (dd, *J* = 13 Hz and 2 Hz, 1H), 4.25 (d, *J* = 13 Hz, 2H), 3.92 (q, *J* = 7.5 Hz, 3H), 3.16-3.25 (m, 1H), 2.84-2.94 (m, 1H), 2.76-2.83 (m, 1H), 2.68 (s, 3H), 2.31-2.37 (m, 1H), 2.15 (td, *J* = 13 Hz and 6 Hz, 1H), 0.98 (t, *J* = 7.5 Hz, 3H).

<sup>13</sup>C NMR (CDCl<sub>3</sub>, 125M): δ 168.6, 155.8, 142.6, 136.2, 133.9, 133.6, 132.4, 130.7, 129.5, 126.9, 126.8, 126.8, 122.1, 119.9, 118.2, 111.1, 109.4, 96.2, 59.2, 49.7, 44.9, 35.3, 33.1, 22.5, 17.6, 14.3.

[α]<sub>D</sub><sup>25</sup> 81.6 (*c* 1.75, CHCl<sub>3</sub>).

HRMS (ESI) calcd. for (C<sub>25</sub>H<sub>25</sub>N<sub>2</sub>O<sub>2</sub>Cl<sub>2</sub>)<sup>+</sup> 455.1289, found 455.1287.

HPLC (Daicel Chiralpak ADH, Hexane : Isopropanol = 4 : 1, Flow rate = 0.7 mL/min, λ = 220 nm): *t*<sub>R</sub> = 9.44 min (minor enantiomer), *t*<sub>R</sub> = 28.50 min (major enantiomer).

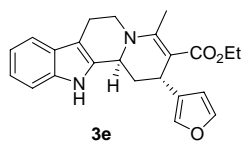

(2*S*,12*bS*)-Ethyl

2-(furan-3-yl)-4-methyl-1,2,6,7,12,12*b*-hexahydroindolo[2,3*α*]quinolizine-3-carboxylate (**3e**): The reaction was carried out at 10 °C for 24h using **B** as catalyst (step 1) and stirred for 24h at 50 °C (step 2), the title product was isolated as a yellow solid (93% yield, 88% ee):

<sup>1</sup>H NMR (CDCl<sub>3</sub>, 500M): δ 7.80 (s, 1H), 7.48 (d, *J* = 8 Hz, 1H), 7.35 (s, 1H), 7.30 (d, *J* = 8 Hz, 1H), 7.09-7.18 (m, 2H), 6.27-6.30 (m, 1H), 5.96-5.99 (m, 1H), 4.24-4.40 (m, 3H), 4.00-4.12 (m, 2H), 3.20-3.30 (m, 1H), 2.72-2.90 (m, 2H), 2.59 (s, 3H), 2.53-2.57 (m, 1H), 1.91 (td, *J* = 12.5 Hz and 5 Hz, 1H), 1.13 (t, *J* = 7 Hz, 3H).

<sup>13</sup>C NMR (CDCl<sub>3</sub>, 125M): δ 169.0, 159.2, 154.9, 141.2, 136.2, 134.0, 126.9, 122.1, 119.9, 118.2, 111.1, 110.3, 109.2, 106.6, 95.4, 59.2, 50.6, 44.9, 32.7, 32.4, 22.5, 17.7, 14.6.

[α]<sub>D</sub><sup>25</sup> 19.2 (*c* 0.31, CHCl<sub>3</sub>).

HRMS (ESI) calcd. for (C<sub>23</sub>H<sub>25</sub>N<sub>2</sub>O<sub>3</sub>)<sup>+</sup> 377.1857, found 377.1859.

HPLC (Daicel Chiralpak ADH, Hexane : Isopropanol = 4 : 1, Flow rate = 0.7 mL/min, λ = 220 nm): *t*<sub>R</sub> = 13.44 min (minor enantiomer), *t*<sub>R</sub> = 38.10 min (major enantiomer).

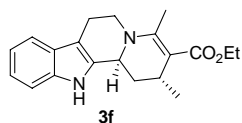

(2*R*,12*bS*)-ethyl 2,4-dimethyl-1,2,6,7,12,12*b*-hexahydroindolo[2,3*α*]quinolizine-3-carboxylate (**3f**): The reaction was carried out at 10 °C for 24h using **B** as catalyst (step 1) and stirred for 24h at 50

°C (step 2), the title product was isolated as a yellow oil (56% yield, 81% ee):

<sup>1</sup>H NMR (CDCl<sub>3</sub>, 500M): δ 7.94 (s, 1H), 7.49 (d, *J* = 7.5 Hz, 1H), 7.33 (d, *J* = 7.5 Hz, 1H), 7.09-7.18 (m, 2H), 4.52-4.58 (m, 1H), 4.07-4.30 (m, 3H), 3.06-3.24 (m, 2H), 2.72-2.90 (m, 2H), 2.49 (s, 3H), 2.05-2.11 (m, 1H), 1.81 (td, *J* = 12.5 Hz and 5 Hz, 1H), 1.29 (t, *J* = 7 Hz, 3H), 1.17 (d, *J* = 7 Hz, 3H).

<sup>13</sup>C NMR (CDCl<sub>3</sub>, 125M): δ 169.5, 153.1, 136.2, 134.6, 127.0, 121.9, 119.8, 118.2, 111.1, 109.1, 101.1, 59.1, 49.8, 44.9, 34.8, 26.5, 22.5, 22.2, 17.7, 14.7.

[α]<sub>D</sub><sup>25</sup> -45.1 (*c* 1.7, CHCl<sub>3</sub>).

HRMS (ESI) calcd. for (C<sub>20</sub>H<sub>25</sub>N<sub>2</sub>O<sub>2</sub>)<sup>+</sup> 325.1923, found 325.1910.

HPLC (Daicel Chiralpak ADH, Hexane : Isopropanol = 4 : 1, Flow rate = 0.7 mL/min, λ = 220 nm): t<sub>R</sub> = 11.07 min (minor enantiomer), t<sub>R</sub> = 19.37 min (major enantiomer).

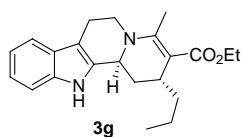

(2*R*,12*bS*)-Ethyl

4-methyl-2-propyl-1,2,6,7,12,12*b*-hexahydroindolo[2,3α]quinolizine-3-carboxylate (**3g**): The reaction was carried out at 10 °C for 48h using **B** as catalyst (step 1) and stirred for 24h at 50 °C (step 2), the title product was isolated as a yellow solid (68% yield, 85% ee):

<sup>1</sup>H NMR (CDCl<sub>3</sub>, 500M): δ 7.82 (s, 1H), 7.49 (d, *J* = 8 Hz, 1H), 7.34 (d, *J* = 8 Hz, 1H), 7.09-7.19 (m, 2H), 4.49-4.55 (m, 1H), 4.05-4.28 (m, 2H), 3.12-3.20 (m, 1H), 2.93-2.99 (m, 1H), 2.72-2.80 (m, 2H), 2.47 (s, 3H), 2.20-2.26 (m, 1H), 1.70 (td, *J* = 12.5 Hz and 5 Hz, 1H), 1.45-1.57 (m, 2H), 1.30-1.45 (m, 2H), 1.28 (t, *J* = 7 Hz, 3H), 0.97 (d, *J* = 6.5 Hz, 3H).

<sup>13</sup>C NMR (CDCl<sub>3</sub>, 125M): δ 169.6, 152.8, 136.1, 134.7, 126.9, 121.8, 119.7, 118.1, 110.9, 108.9, 100.3, 59.0, 50.0, 45.0, 38.2, 36.1, 31.2, 30.9, 22.5, 20.4, 17.6, 14.6, 14.2.

[α]<sub>D</sub><sup>25</sup> -44.8 (*c* 1.50, CHCl<sub>3</sub>).

HRMS (ESI) calcd. for (C<sub>22</sub>H<sub>28</sub>N<sub>2</sub>O<sub>2</sub>Na)<sup>+</sup> 375.2054, found 375.2043.

HPLC (Daicel Chiralpak ADH, Hexane : Isopropanol = 4 : 1, Flow rate = 0.7 mL/min, λ = 220 nm): t<sub>R</sub> = 9.36 min (minor enantiomer), t<sub>R</sub> = 17.79 min (major enantiomer).

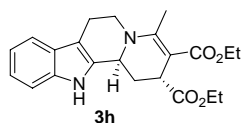

(2*R*,12*bS*)-Diethyl 4-methyl-1,2,6,7,12,12*b*-hexahydroindolo[2,3α]quinolizine-2,3-dicarboxylate (**3h**): The reaction was carried out at 10 °C for 2h using **B** as catalyst (step 1) and stirred for 18h at 50 °C (step 2), the title product was isolated as a yellow solid (59% yield, 69% ee):

<sup>1</sup>H NMR (CDCl<sub>3</sub>, 500M): δ 7.90 (s, 1H), 7.49 (d, *J* = 8 Hz, 1H), 7.34 (d, *J* = 8 Hz, 1H), 7.10-7.20 (m, 2H), 4.52-4.58 (m, 1H), 4.05-4.30 (m, 3H), 3.83-3.87 (m, 1H), 3.15-3.24 (m, 1H), 2.74-2.88 (m, 2H), 2.58-2.61 (m, 1H), 2.56 (s, 3H), 1.88 (td, *J* = 13 Hz and 5.5 Hz, 1H), 1.31 (t, *J* = 7.5 Hz, 3H), 1.24 (t, *J* = 7 Hz, 3H).

<sup>13</sup>C NMR (CDCl<sub>3</sub>, 125M): δ 175.9, 168.8, 155.0, 136.3, 133.5, 126.8, 122.1, 119.8, 118.3, 111.2, 109.2, 93.8, 60.9, 59.4, 51.0, 44.8, 38.9, 30.5, 22.4, 17.5, 14.6, 14.3.

[α]<sub>D</sub><sup>25</sup> 83.7 (*c* 0.33, CHCl<sub>3</sub>).

HRMS (ESI) calcd. for (C<sub>22</sub>H<sub>27</sub>N<sub>2</sub>O<sub>4</sub>)<sup>+</sup> 383.1973, found 383.1965.

HPLC (Daicel Chiralpak ADH, Hexane : Isopropanol = 4 : 1, Flow rate = 0.7 mL/min, λ = 220 nm): t<sub>R</sub> = 13.03 min (minor enantiomer), t<sub>R</sub> = 32.37 min (major enantiomer).

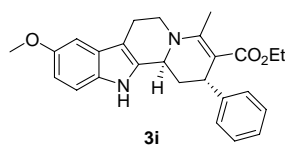

(2*S*,12*bS*)-Ethyl

9-methoxy-4-methyl-2-phenyl-1,2,6,7,12,12*b*-hexahydroindolo[2,3*a*]quinolizine-3-carboxylate

(**3i**): The reaction was carried out at 10 °C for 24h using **B** as catalyst (step 1) and stirred for 2h at 50 °C (step 2), the title product was isolated as a yellow solid (70% yield, 94% ee):

<sup>1</sup>H NMR (CDCl<sub>3</sub>, 500M): δ 7.58 (s, 1H), 7.10 -7.33 (m, 6H), 6.90-6.94 (m, 1H), 6.76-6.81 (m, 1H), 4.24 -4.38 (m, 3H), 3.90-3.98 (m, 2H), 3.84 (s, 3H), 3.12-3.22 (m, 1H), 2.80-2.88 (m, 1H), 2.68 -2.76 (m, 1H), 2.65 (s, 3H), 2.24-2.31 (m, 1H), 2.06 (td, *J* = 12.5 Hz and 5 Hz, 1H), 0.99 (t, *J* = 7.5 Hz, 3H).

<sup>13</sup>C NMR (CDCl<sub>3</sub>, 125M): δ 169.1, 154.8, 154.3, 147.2, 135.1, 131.2, 128.4, 127.9, 127.3, 126.1, 122.1, 111.6, 109.1, 93.8, 100.5, 97.0, 59.1, 56.1, 49.7, 44.9, 38.2, 36.1, 30.5, 22.6, 17.7, 14.4.

[α]<sub>D</sub><sup>25</sup> 119.4 (*c* 1.05, CHCl<sub>3</sub>).

HRMS (ESI) calcd. for (C<sub>26</sub>H<sub>29</sub>N<sub>2</sub>O<sub>3</sub>)<sup>+</sup> 417.2188, found 417.2173.

HPLC (Daicel Chiralpak ADH, Hexane : Isopropanol = 4 : 1, Flow rate = 0.7 mL/min, λ = 220 nm): t<sub>R</sub> = 16.32 min (minor enantiomer), t<sub>R</sub> = 42.91 min (major enantiomer).

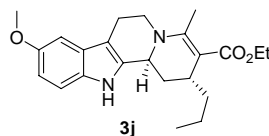

(2*R*,12*bS*)-ethyl

9-methoxy-4-methyl-2-propyl-1,2,6,7,12,12*b*-hexahydroindolo[2,3*a*]quinolizine-3-carboxylate

(**3j**): The reaction was carried out at -15 °C for 48h using **A** as catalyst (step 1) and stirred for 1h at 50 °C (step 2), the title product was isolated as a yellow solid (93% yield, 93% ee):

<sup>1</sup>H NMR (CDCl<sub>3</sub>, 500M): δ 7.81 (s, 1H), 7.22 (d, *J* = 8.5 Hz, 1H), 6.94 (d, *J* = 2.5 Hz, 1H), 6.82 (dd, *J* = 9 Hz and 2.5 Hz, 1H), 4.53 (d, *J* = 13 Hz, 1H), 4.09-4.30 (m, 3H), 3.88 (s, 3H), 3.14-3.23 (m, 1H), 2.95-3.02 (m, 1H), 2.80-2.89 (m, 1H), 2.70-2.77 (m, 1H), 2.50 (s, 3H), 2.24 (ddd, *J* = 13 Hz, 5 Hz and 2.5 Hz, 1H), 1.72 (td, *J* = 13 Hz and 5 Hz, 1H), 1.46-1.59 (m, 2H), 1.32-1.45 (m, 2H), 1.30 (t, *J* = 7.5 Hz, 3H), 0.99 (t, *J* = 7 Hz, 3H).

<sup>13</sup>C NMR (CDCl<sub>3</sub>, 125M): δ 169.6, 154.2, 152.7, 135.6, 131.1, 127.4, 111.6, 111.5, 108.8, 100.4, 100.3, 58.9, 55.9, 50.1, 45.0, 38.2, 31.3, 30.9, 22.5, 20.4, 17.6, 14.6, 14.3.

[α]<sub>D</sub><sup>25</sup> -22.8 (*c* 1.60, CHCl<sub>3</sub>).

HRMS (ESI) calcd. for (C<sub>23</sub>H<sub>31</sub>N<sub>2</sub>O<sub>3</sub>)<sup>+</sup> 383.2323, found 383.2329.

HPLC (Daicel Chiralpak ADH, Hexane : Isopropanol = 4 : 1, Flow rate = 0.7 mL/min, λ = 220 nm): t<sub>R</sub> = 16.30 min (minor enantiomer), t<sub>R</sub> = 35.88 min (major enantiomer).

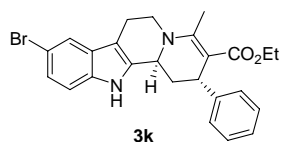

(2*S*,12*bS*)-Ethyl

9-bromo-4-methyl-2-phenyl-1,2,6,7,12,12*b*-hexahydroindolo[2,3*a*]quinolizine-3-carboxylate (**3k**):

The reaction was carried out at 10 °C for 24h using **B** as catalyst (step 1) and stirred for 20h at 50 °C (step 2), the title product was isolated as a yellow solid (67% yield, 94% ee):

<sup>1</sup>H NMR (CDCl<sub>3</sub>, 500M): δ 7.87 (s, 1H), 7.58 (d, *J* = 2 Hz, 1H), 7.26-7.33 (m, 2H), 7.17-7.25 (m, 4H), 7.09 (d, *J* = 4 Hz, 1H), 4.22 -4.35 (m, 3H), 3.89-3.97 (m, 2H), 3.10-3.19 (m, 1H), 2.74-2.85 (m, 1H), 2.65-2.72 (m, 1H), 2.63 (s, 3H), 2.28 (ddd, *J* = 12.5 Hz, 3.5 Hz and 2.5 Hz, 1H), 2.05 (td, *J* = 12.5 Hz and 5.5 Hz, 1H), 1.46-1.59 (m, 2H), 0.98 (t, *J* = 7 Hz, 3H).

<sup>13</sup>C NMR (CDCl<sub>3</sub>, 125M): δ 169.1, 154.8, 146.9, 135.6, 134.8, 131.1, 128.7, 128.4, 127.9, 126.2, 124.6, 120.8, 112.9, 112.4, 108.8, 97.2, 59.1, 49.6, 44.8, 38.2, 35.9, 22.4, 17.7, 14.4.

[α]<sub>D</sub><sup>25</sup> 59.6 (*c* 0.3, CHCl<sub>3</sub>).

HRMS (ESI) calcd. for (C<sub>25</sub>H<sub>26</sub>N<sub>2</sub>O<sub>2</sub>Br)<sup>+</sup> 465.1194, found 465.1172.

HPLC (Daicel Chiralpak ADH, Hexane : Isopropanol = 4 : 1, Flow rate = 0.7 mL/min, λ = 220 nm): t<sub>R</sub> = 12.66 min (minor enantiomer), t<sub>R</sub> = 38.74 min (major enantiomer).

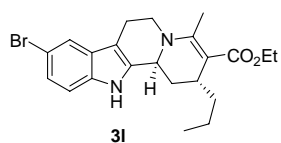

(2*R*,12*bS*)-ethyl

9-bromo-4-methyl-2-propyl-1,2,6,7,12,12*b*-hexahydroindolo[2,3*a*]quinolizine-3-carboxylate

(**3l**): The reaction was carried out at -15 °C for 48h using **A** as catalyst (step 1) and stirred for 18h at 50 °C (step 2), the title product was isolated as a yellow solid (57% yield, 92% ee):

<sup>1</sup>H NMR (CDCl<sub>3</sub>, 500M): δ 8.06 (s, 1H), 7.60 (s, 1H), 7.17-7.25 (m, 2H), 4.51 (d, *J* = 13 Hz, 1H), 4.04-4.27 (m, 3H), 3.10-3.18 (m, 1H), 3.88 (s, 3H), 2.93-2.99 (m, 1H), 2.75-2.85 (m, 1H), 2.65-2.72 (m, 1H), 2.46 (s, 3H), 2.24 (ddd, *J* = 13 Hz, 4 Hz and 2.5 Hz, 1H), 1.69 (td, *J* = 13 Hz and 5 Hz, 1H), 1.45-1.56 (m, 2H), 1.29-1.43 (m, 2H), 1.27 (t, *J* = 7 Hz, 3H), 0.96 (t, *J* = 7 Hz, 3H).

<sup>13</sup>C NMR (CDCl<sub>3</sub>, 125M): δ 169.5, 152.5, 136.1, 134.7, 128.7, 124.5, 120.8, 112.9, 112.3, 108.7, 100.6, 59.1, 49.9, 44.8, 38.1, 31.2, 30.9, 22.3, 20.4, 17.6, 14.6, 14.2.

[α]<sub>D</sub><sup>25</sup> 55.3 (*c* 1.15, CHCl<sub>3</sub>).

HRMS (ESI) calcd. for (C<sub>22</sub>H<sub>28</sub>N<sub>2</sub>O<sub>2</sub>Br)<sup>+</sup> 431.1321, found 431.1328.

HPLC (Daicel Chiralpak ADH, Hexane : Isopropanol = 4 : 1, Flow rate = 0.7 mL/min, λ = 220 nm): t<sub>R</sub> = 11.89 min (minor enantiomer), t<sub>R</sub> = 27.29 min (major enantiomer).

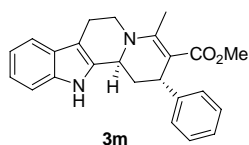

(2*S*,12*bS*)-Methyl

4-methyl-2-phenyl-1,2,6,7,12,12b-hexahydroindolo[2,3a]quinolizine-3-carboxylate (**3m**): The reaction was carried out at -15 °C for 24h using **A** as catalyst (step 1) and stirred for 24h at 50 °C (step 2), the title product was isolated as a yellow solid (95% yield, 92% ee):

<sup>1</sup>H NMR (CDCl<sub>3</sub>, 500M): δ 7.68 (s, 1H), 7.47 (d, *J* = 7.5 Hz, 1H), 7.29-7.35 (m, 2H), 7.19-7.28 (m, 4H), 7.06-7.17 (m, 2H), 4.35 (dd, *J* = 13 Hz and 3.5 Hz, 1H), 4.29-4.31 (m, 1H), 4.23-4.29 (m, 1H), 3.49 (s, 3H), 3.14-3.21 (m, 1H), 2.82-2.91 (m, 1H), 2.73-2.80 (m, 1H), 2.68 (s, 3H), 2.32 (ddd, *J* = 13 Hz, 3.5 Hz and 2.5 Hz, 1H), 2.06 (td, *J* = 13 Hz and 5 Hz, 1H).

<sup>13</sup>C NMR (CDCl<sub>3</sub>, 125M): δ 155.1, 146.7, 139.6, 136.1, 134.1, 128.5, 127.9, 126.9, 126.2, 121.9, 119.8, 118.2, 111.0, 109.2, 96.3, 50.8, 49.7, 45.0, 37.9, 36.2, 22.6, 17.6.

[α]<sub>D</sub><sup>25</sup> 38.3 (*c* 1.05, CHCl<sub>3</sub>).

HRMS (ESI) calcd. for (C<sub>24</sub>H<sub>25</sub>N<sub>2</sub>O<sub>2</sub>)<sup>+</sup> 373.1903, found 373.1910.

HPLC (Daicel Chiralpak ADH, Hexane : Isopropanol = 4 : 1, Flow rate = 0.7 mL/min, λ = 220 nm): t<sub>R</sub> = 12.23 min (minor enantiomer), t<sub>R</sub> = 39.82 min (major enantiomer).

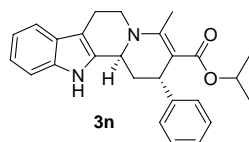

(2*S*,12*bS*)-Isopropyl

4-methyl-2-phenyl-1,2,6,7,12,12b-hexahydroindolo[2,3a]quinolizine-3-carboxylate (**3n**): The reaction was carried out at -15 °C for 24h using **A** as catalyst (step 1) and stirred for 20h at 50 °C (step 2), the title product was isolated as a yellow solid (95% yield, 96% ee):

<sup>1</sup>H NMR (CDCl<sub>3</sub>, 500M): δ 7.72 (s, 1H), 7.43-7.51 (m, 1H), 7.18-7.35 (m, 6H), 7.07-7.18 (m, 2H), 4.84 (m, *J* = 6.5 Hz, 1H), 4.25-4.35 (m, 3H), 3.15-3.24 (m, 1H), 2.73-2.91 (m, 2H), 2.65 (s, 3H), 2.24-2.32 (m, 1H), 2.07 (td, *J* = 13 Hz and 5.5 Hz, 1H), 1.13 (d, *J* = 6.5 Hz, 1H), 0.77 (d, *J* = 6.5 Hz, 1H).

<sup>13</sup>C NMR (CDCl<sub>3</sub>, 125M): δ 168.7, 154.8, 147.6, 139.6, 136.2, 134.2, 128.3, 128.1, 126.9, 126.0, 121.8, 119.7, 118.1, 111.0, 109.2, 97.8, 65.8, 49.5, 44.8, 38.5, 36.1, 22.5, 22.3, 21.5, 17.7.

[α]<sub>D</sub><sup>25</sup> -85.9 (*c* 0.19, CHCl<sub>3</sub>).

HRMS (ESI) calcd. for (C<sub>26</sub>H<sub>29</sub>N<sub>2</sub>O<sub>2</sub>)<sup>+</sup> 401.2219, found 401.2223.

HPLC (Daicel Chiralpak ADH, Hexane : Isopropanol = 4 : 1, Flow rate = 0.7 mL/min, λ = 220 nm): t<sub>R</sub> = 10.21 min (minor enantiomer), t<sub>R</sub> = 21.80 min (major enantiomer).

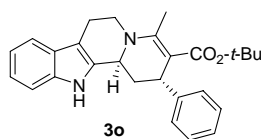

(2*S*,12*bS*)-*t*-butyl

4-methyl-2-phenyl-1,2,6,7,12,12b-hexahydroindolo[2,3a]quinolizine-3-carboxylate (**3o**): The reaction was carried out at -15 °C for 72h using **A** as catalyst (step 1) and stirred for 24h at 50 °C (step 2), the title product was isolated as a yellow solid (73% yield, 96% ee):

<sup>1</sup>H NMR (CDCl<sub>3</sub>, 500M): δ 7.62 (s, 1H), 7.45-7.50 (m, 1H), 7.18-7.35 (m, 6H), 7.07-7.18 (m, 2H), 4.24-4.34 (m, 1H), 4.18-4.23 (m, 1H), 3.15-3.24 (m, 1H), 2.72-2.92 (m, 2H), 2.61 (s, 3H), 2.21-2.28 (m, 1H), 2.08 (td, *J* = 12.5 Hz and 5.5 Hz, 1H), 1.19 (s, 9H).

$^{13}\text{C}$  NMR ( $\text{CDCl}_3$ , 125M):  $\delta$  168.8, 154.3, 147.9, 136.2, 134.2, 128.3, 128.2, 126.9, 126.0, 121.9, 119.8, 118.2, 110.9, 109.3, 99.5, 49.4, 44.7, 39.1, 36.3, 28.3, 22.5, 17.8.

$[\alpha]^{25}_{\text{D}}$  78.4 ( $c$  0.60,  $\text{CHCl}_3$ ).

HRMS (ESI) calcd. for  $(\text{C}_{27}\text{H}_{31}\text{N}_2\text{O}_2)^+$  415.2385, found 415.2380.

HPLC (Daicel Chiralpak ADH, Hexane : Isopropanol = 4 : 1, Flow rate = 0.7 mL/min,  $\lambda$  = 220 nm):  $t_{\text{R}}$  = 8.91 min (minor enantiomer),  $t_{\text{R}}$  = 12.87 min (major enantiomer).

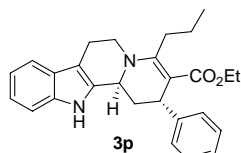

(2*S*,12*bS*)-ethyl

2-phenyl-4-propyl-1,2,6,7,12,12*b*-hexahydroindolo[2,3*a*]quinolizine-3-carboxylate (**3p**): The reaction was carried out at  $-15\text{ }^\circ\text{C}$  for 24h using **A** as catalyst (step 1) and stirred for 20h at  $50\text{ }^\circ\text{C}$  (step 2), the title product was isolated as a yellow solid (92% yield, 94% ee):

$^1\text{H}$  NMR ( $\text{CDCl}_3$ , 500M):  $\delta$  7.72 (s, 1H), 7.44-7.52 (m, 2H), 7.30-7.36 (m, 2H), 7.20-7.28 (m, 3H), 7.08-7.18 (m, 2H), 4.23-4.35 (m, 3H), 4.18-4.23 (m, 1H), 3.96 (q,  $J$  = 7 Hz, 2H), 3.36-3.47 (m, 1H), 3.18-3.27 (m, 1H), 2.71-2.95 (m, 3H), 2.26-2.33 (m, 1H), 2.07 (td,  $J$  = 13 Hz and 5 Hz, 1H), 1.83-1.95 (m, 1H), 1.62-1.74 (m, 1H), 1.14 (t,  $J$  = 7 Hz, 3H), 1.02 (t,  $J$  = 7 Hz, 3H).

$^{13}\text{C}$  NMR ( $\text{CDCl}_3$ , 125M):  $\delta$  168.6, 159.1, 147.3, 136.2, 134.2, 128.3, 127.9, 126.9, 126.1, 121.9, 119.7, 118.1, 111.0, 109.2, 95.8, 58.9, 49.6, 44.6, 38.1, 36.2, 31.8, 22.8, 14.4.

$[\alpha]^{25}_{\text{D}}$  62.3 ( $c$  0.80,  $\text{CHCl}_3$ ).

HRMS (ESI) calcd. for  $(\text{C}_{27}\text{H}_{31}\text{N}_2\text{O}_2)^+$  415.2374, found 415.2380.

HPLC (Daicel Chiralpak ADH, Hexane : Isopropanol = 4 : 1, Flow rate = 0.7 mL/min,  $\lambda$  = 220 nm):  $t_{\text{R}}$  = 9.76 min (minor enantiomer),  $t_{\text{R}}$  = 61.16 min (major enantiomer).

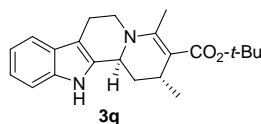

(2*S*,12*bS*)-*t*-butyl 2,4-dimethyl-1,2,6,7,12,12*b*-hexahydroindolo[2,3*a*]quinolizine-3-carboxylate<sup>10a</sup> (**3q**): The reaction was carried out at  $-15\text{ }^\circ\text{C}$  for 24h using **A** as catalyst (step 1) and stirred for 20h at  $50\text{ }^\circ\text{C}$  (step 2), the title product was isolated as a yellow solid (51% yield, 80% ee):

$^1\text{H}$  NMR ( $\text{CDCl}_3$ , 500M):  $\delta$  7.82 (s, 1H), 7.49 (d,  $J$  = 8 Hz, 1H), 7.34 (d,  $J$  = 8 Hz, 1H), 7.08-7.20 (m, 2H), 4.44-4.51 (m, 1H), 4.15-4.23 (m, 1H), 3.11-3.21 (m, 1H), 2.96-3.06 (m, 1H), 2.72-2.89 (m, 2H), 2.43 (s, 3H), 2.00-2.08 (m, 1H), 1.81 (td,  $J$  = 12.5 Hz and 5.5 Hz, 1H), 1.50 (s, 9H).

$[\alpha]^{25}_{\text{D}}$  -11.4 ( $c$  0.95,  $\text{CHCl}_3$ ).

HPLC (Daicel Chiralpak ADH, Hexane : Isopropanol = 4 : 1, Flow rate = 0.7 mL/min,  $\lambda$  = 220 nm):  $t_{\text{R}}$  = 10.09 min (minor enantiomer),  $t_{\text{R}}$  = 12.04 min (major enantiomer).



Crystal structure for *en-3a*:

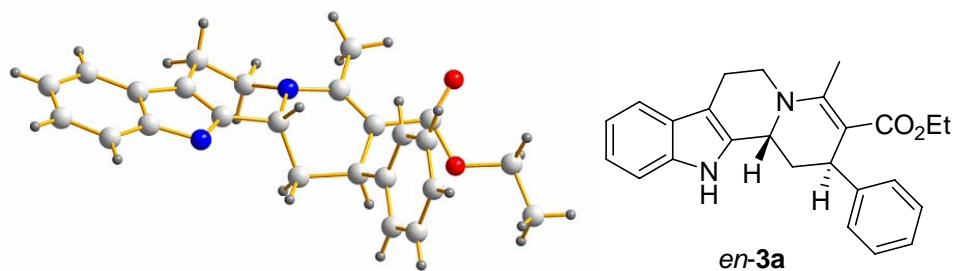

|                                   |                                                                                                                     |
|-----------------------------------|---------------------------------------------------------------------------------------------------------------------|
| Identification code               | gd                                                                                                                  |
| Empirical formula                 | C <sub>25</sub> H <sub>25</sub> N <sub>2</sub> O <sub>2</sub>                                                       |
| Formula weight                    | 385.47                                                                                                              |
| Temperature                       | 296(2) K                                                                                                            |
| Wavelength                        | 0.71073 Å                                                                                                           |
| Crystal system, space group       | Monoclinic, P2(1)                                                                                                   |
| Unit cell dimensions              | a = 8.356(3) Å    alpha = 90 deg.<br>b = 7.930(2) Å    beta = 103.369(4) deg.<br>c = 15.722(5) Å    gamma = 90 deg. |
| Volume                            | 1013.6(5) Å <sup>3</sup>                                                                                            |
| Z, Calculated density             | 2, 1.263 Mg/m <sup>3</sup>                                                                                          |
| Absorption coefficient            | 0.080 mm <sup>-1</sup>                                                                                              |
| F(000)                            | 410                                                                                                                 |
| Crystal size                      | 0.27 x 0.22 x 0.15 mm                                                                                               |
| Theta range for data collection   | 2.51 to 25.25 deg.                                                                                                  |
| Limiting indices                  | -8<=h<=10, -9<=k<=9, -18<=l<=12                                                                                     |
| Reflections collected / unique    | 5268 / 3536 [R(int) = 0.0305]                                                                                       |
| Completeness to theta = 25.25     | 99.9 %                                                                                                              |
| Absorption correction             | Semi-empirical from equivalents                                                                                     |
| Max. and min. transmission        | 0.9880 and 0.9786                                                                                                   |
| Refinement method                 | Full-matrix least-squares on F <sup>2</sup>                                                                         |
| Data / restraints / parameters    | 3536 / 1 / 265                                                                                                      |
| Goodness-of-fit on F <sup>2</sup> | 1.046                                                                                                               |
| Final R indices [I>2sigma(I)]     | R1 = 0.0480, wR2 = 0.1095                                                                                           |
| R indices (all data)              | R1 = 0.0665, wR2 = 0.1222                                                                                           |
| Absolute structure parameter      | 1.2(18)                                                                                                             |
| Extinction coefficient            | 0.009(3)                                                                                                            |
| Largest diff. peak and hole       | 0.271 and -0.164 e.Å <sup>-3</sup>                                                                                  |

# Determination of relative configuration of **3j**:

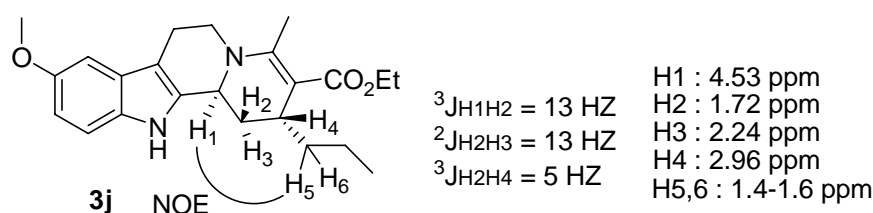

HMQC, WXY251A C-H COSY

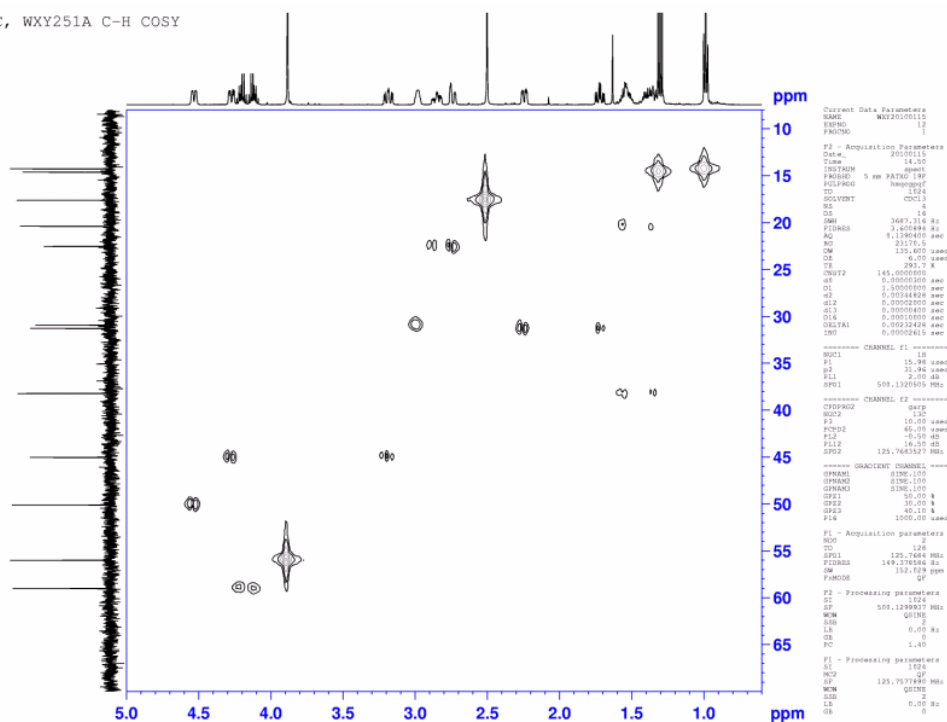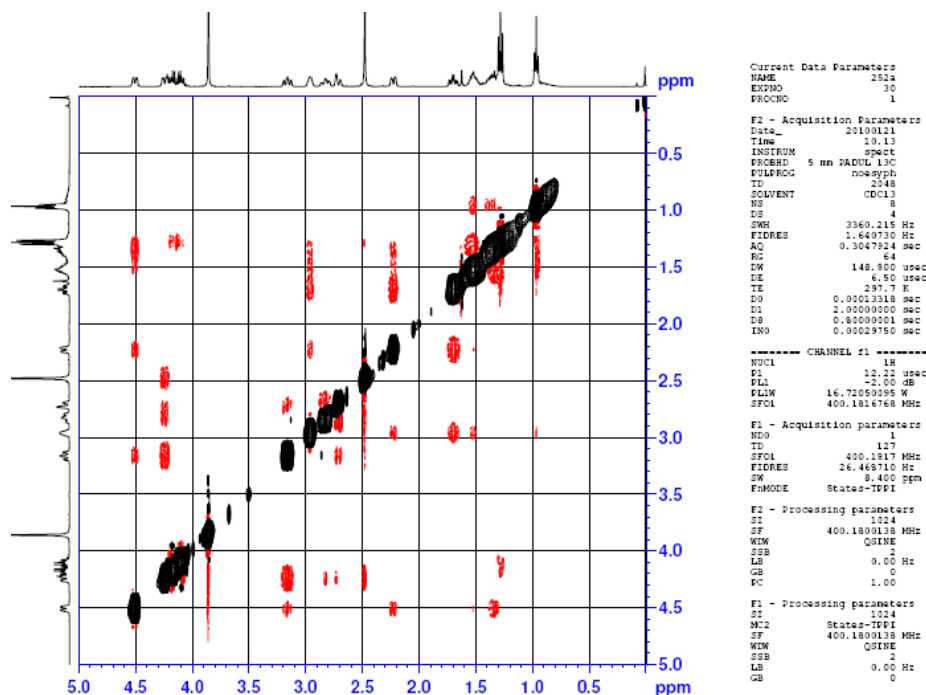

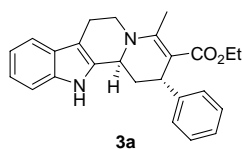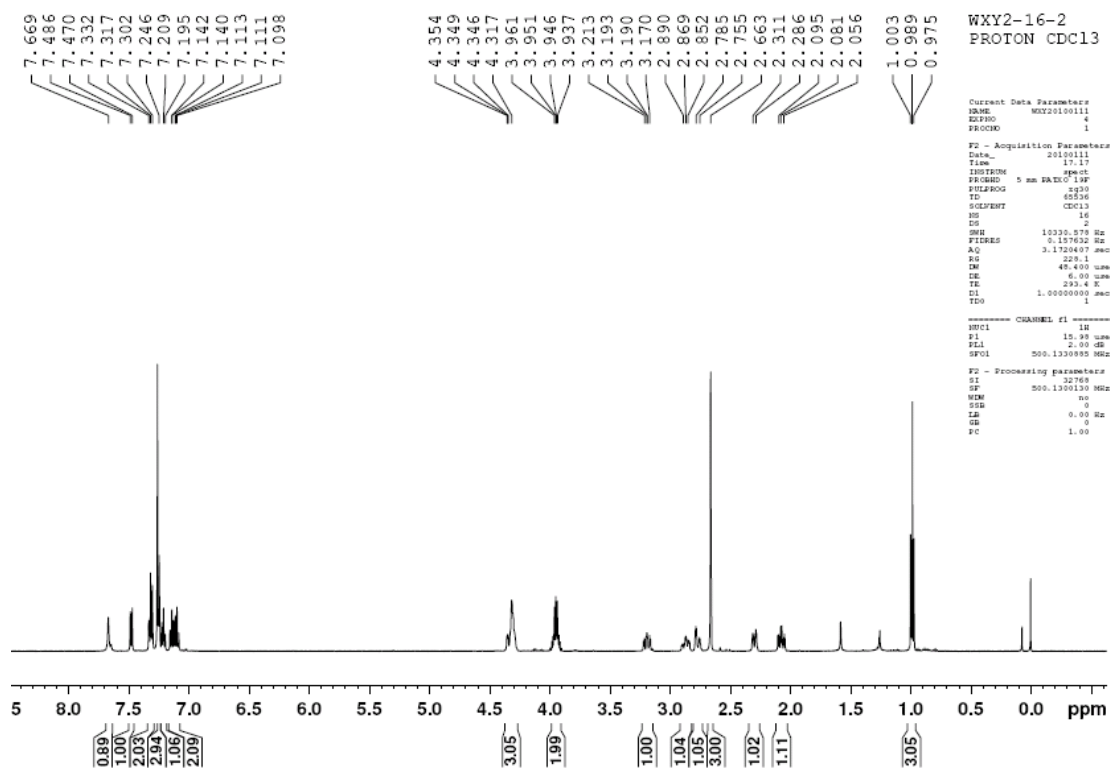

WXY-2-16-2 C13  
C13CPD CDCl3

Current Data Parameters  
NAME: WXY2-16-2  
EXPNO: 3  
PROCNO: 1

F2 - Acquisition Parameters  
Date\_: 20101126  
Time: 11.59  
INSTRUM: spect  
PROBHD: 5 mm QNP 1H/1  
PULPROG: zgpg30  
TD: 65536  
SOLVENT: CDCl3  
NS: 136  
DS: 4  
SWH: 30030.02 Hz  
FIDRES: 0.476222 Hz  
AQ: 1.012410 sec  
RG: 143.7  
DE: 16.00 usec  
TE: 295.4 K  
D1: 2.00000000 sec  
C11: 0.03000000 sec  
DETM: 1.09999999 sec  
TD0: 1

===== CHANNEL f1 =====  
NUC1: 13C  
P1: 9.50 usec  
PL1: -2.50 dB  
SFO1: 125.770543 MHz

===== CHANNEL f2 =====  
CPDPRG2: waltz16  
NUC2: 1H  
PCPD2: 90.00 usec  
PL2: 2.00 dB  
PL12: 16.50 dB  
PL13: 16.50 dB  
SFO2: 500.1300130 MHz

F2 - Processing parameters  
SI: 32768  
SF: 125.7577050 MHz  
WDW: no  
SSB: 0  
LB: 0.00 Hz  
GB: 0  
PC: 1.40

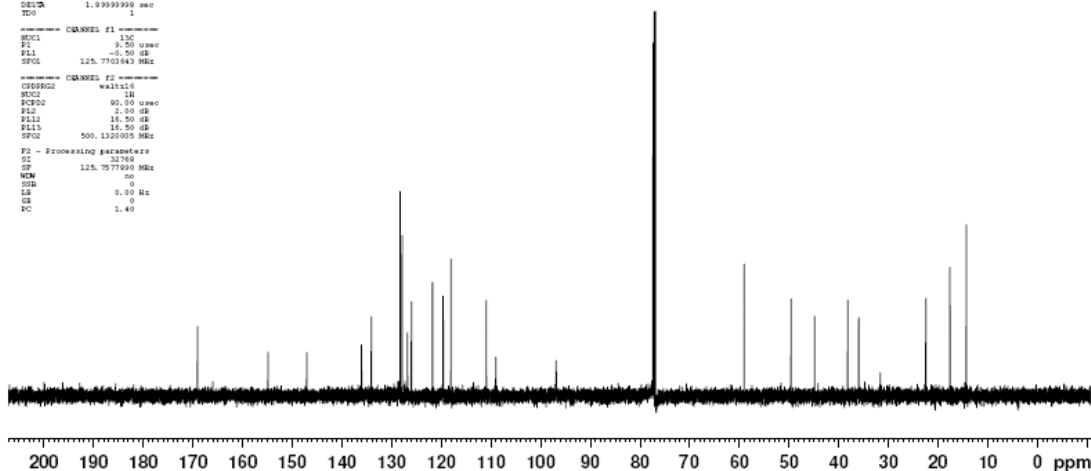

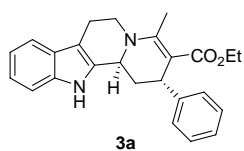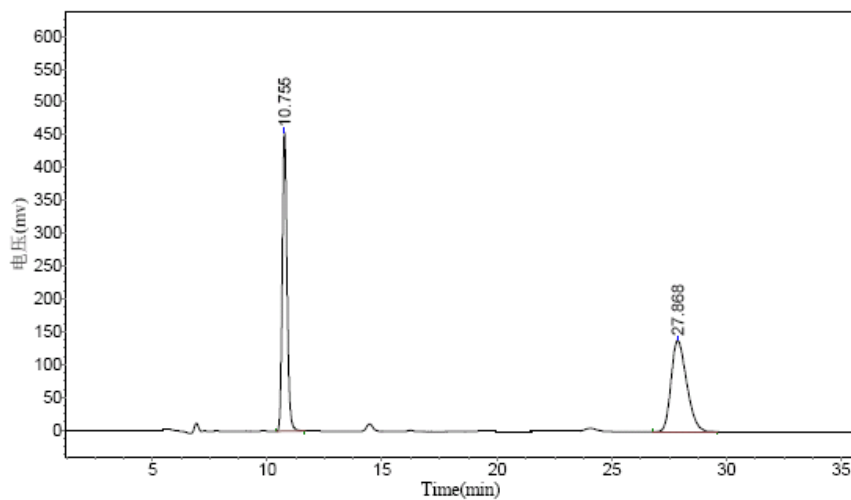

#### Results

| Peak No. | Peak ID | Ret Time | Height     | Area         | Conc.    |
|----------|---------|----------|------------|--------------|----------|
| 1        |         | 10.755   | 454087.625 | 6554487.000  | 49.9125  |
| 2        |         | 27.868   | 139026.250 | 6577465.500  | 50.0875  |
| Total    |         |          | 593113.875 | 13131952.500 | 100.0000 |

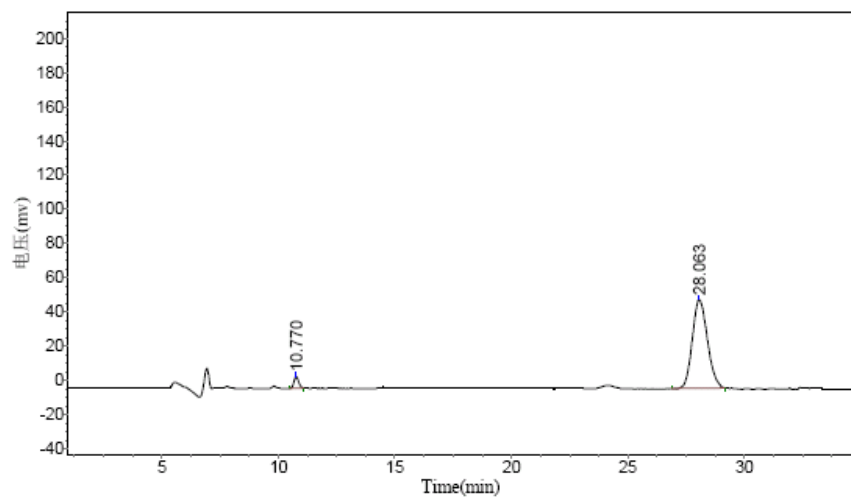

#### Results

| Peak No. | Peak ID | Ret Time | Height    | Area        | Conc.    |
|----------|---------|----------|-----------|-------------|----------|
| 1        |         | 10.770   | 6769.314  | 94058.102   | 3.8833   |
| 2        |         | 28.063   | 51617.672 | 2328083.000 | 96.1167  |
| Total    |         |          | 58386.986 | 2422141.102 | 100.0000 |

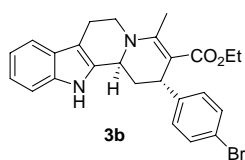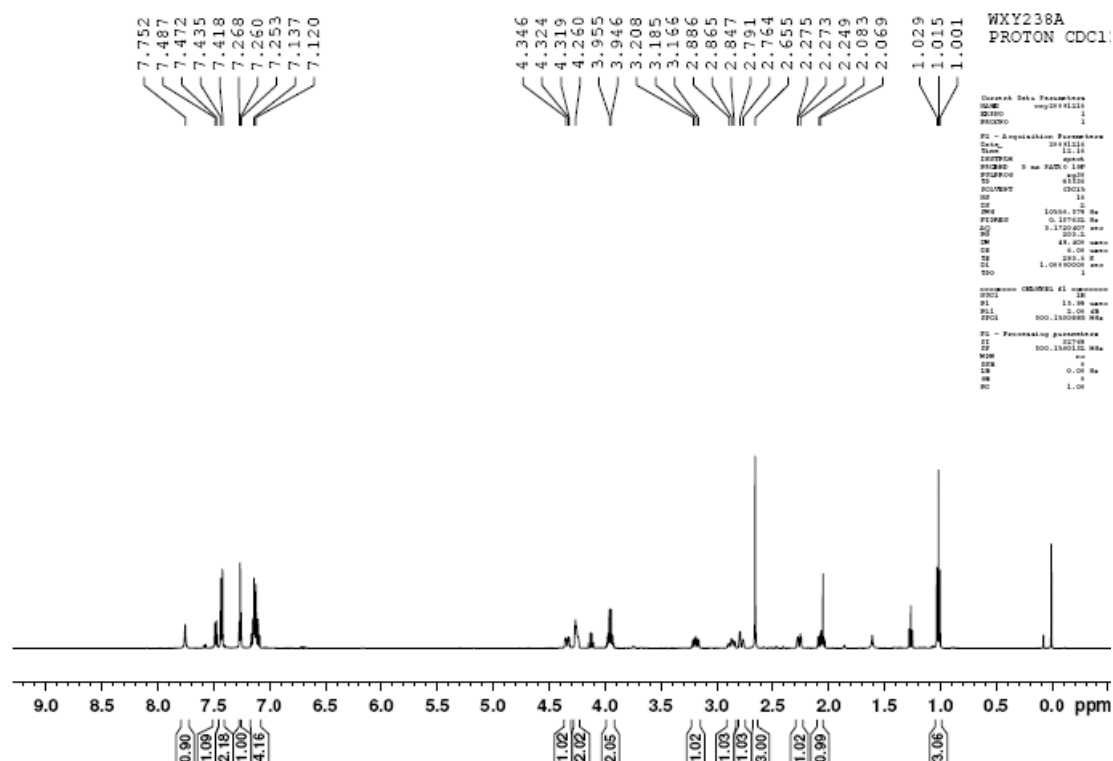

WXYZ38A C13  
C13CPD CDCl<sub>3</sub>

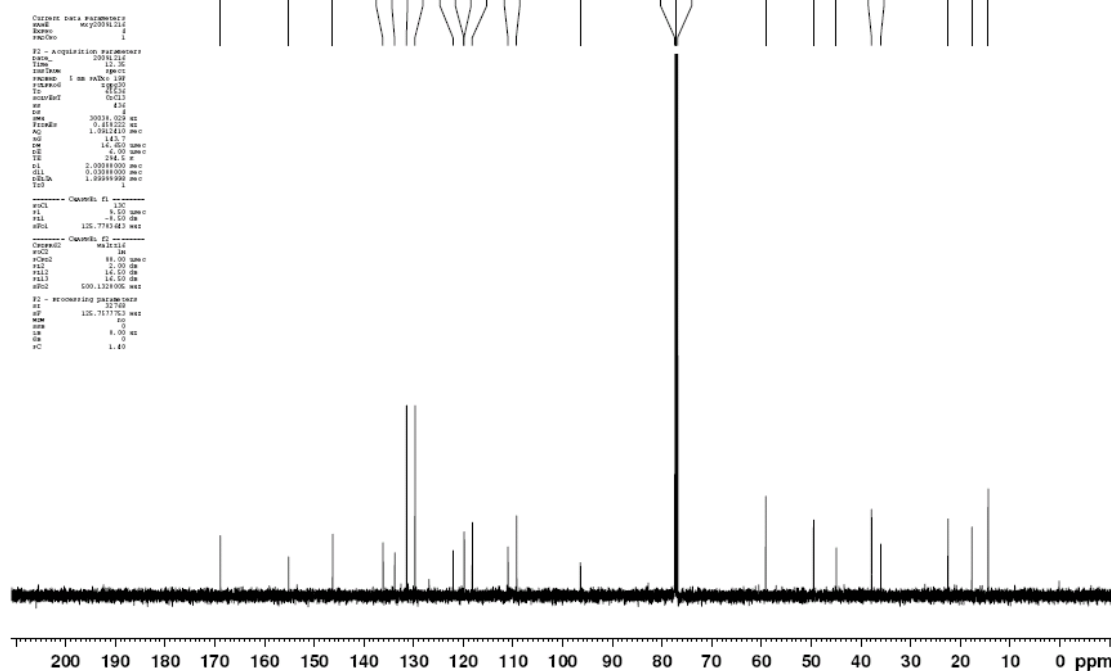

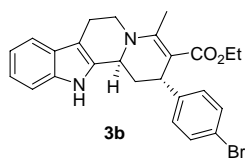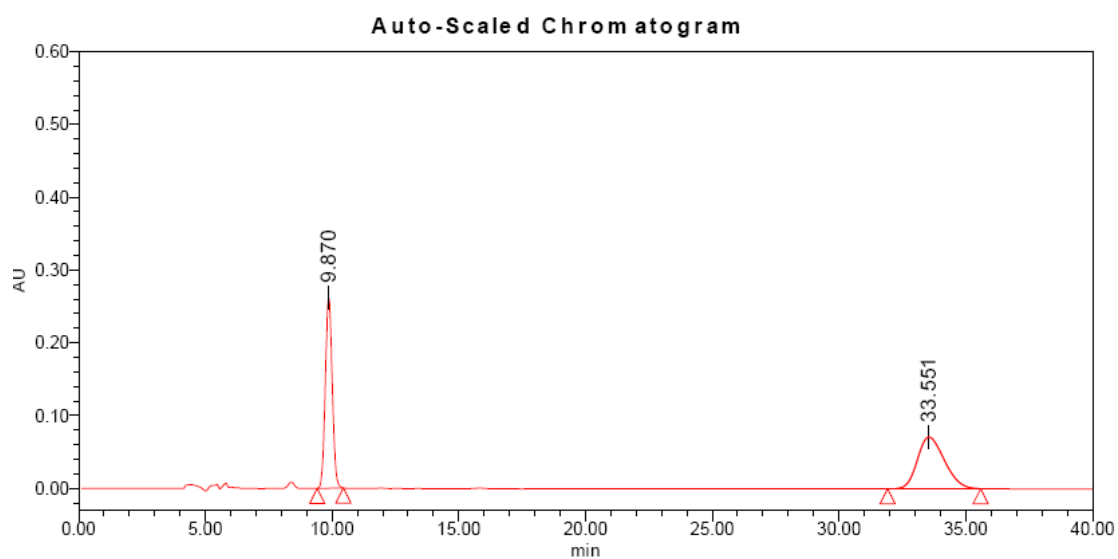

**Peak Results**

|   | Name | RT     | Area    | Height | % Height | % Area |
|---|------|--------|---------|--------|----------|--------|
| 1 |      | 9.870  | 4962590 | 261493 | 78.61    | 48.52  |
| 2 |      | 33.551 | 5264667 | 71137  | 21.39    | 51.48  |

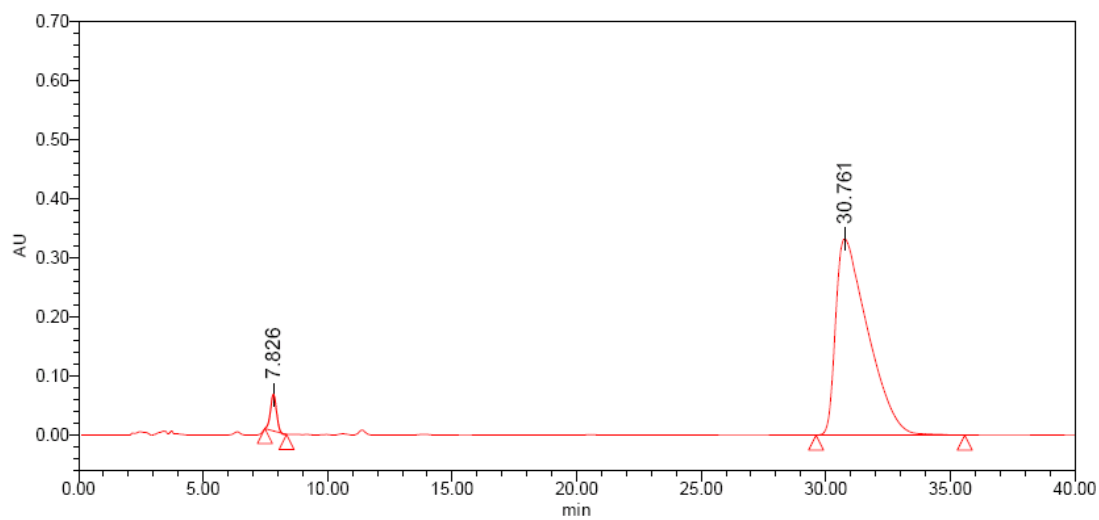

**Peak Results**

|   | Name | RT     | Area     | Height | % Height | % Area |
|---|------|--------|----------|--------|----------|--------|
| 1 |      | 7.826  | 1044936  | 62048  | 15.73    | 3.39   |
| 2 |      | 30.761 | 29814616 | 332407 | 84.27    | 96.61  |



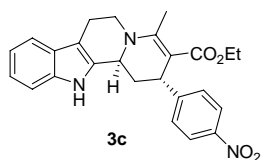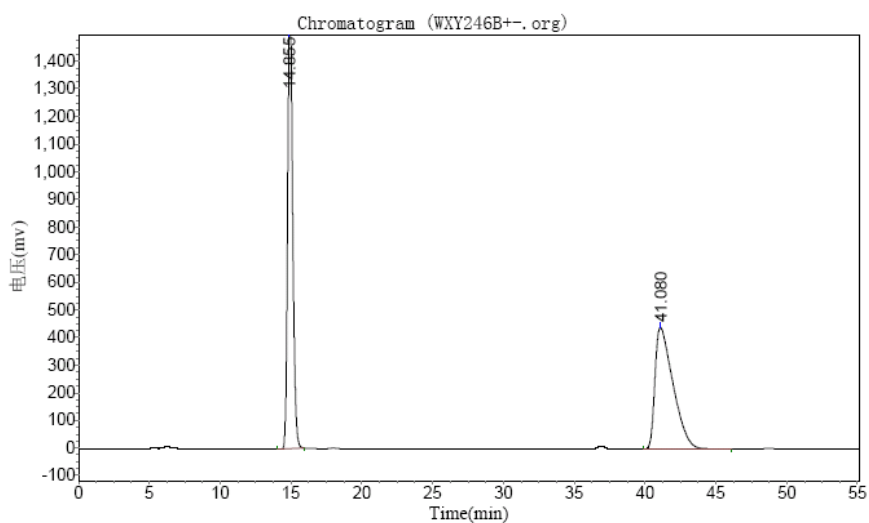

### Results

| Peak No. | Peak ID | Ret Time | Height      | Area         | Conc.    |
|----------|---------|----------|-------------|--------------|----------|
| 1        |         | 14.855   | 1491209.750 | 38885500.000 | 49.9417  |
| 2        |         | 41.080   | 440323.031  | 38976280.000 | 50.0583  |
| Total    |         |          | 1931532.781 | 77861780.000 | 100.0000 |

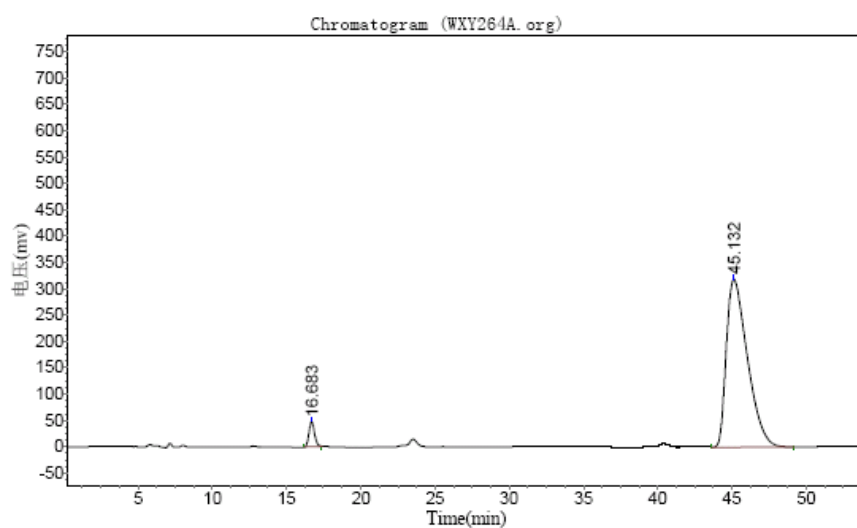

### Results

| Peak No. | Peak ID | Ret Time | Height     | Area         | Conc.    |
|----------|---------|----------|------------|--------------|----------|
| 1        |         | 16.683   | 47871.648  | 1234859.375  | 3.7885   |
| 2        |         | 45.132   | 318240.594 | 31359720.000 | 96.2115  |
| Total    |         |          | 366112.242 | 32594579.375 | 100.0000 |



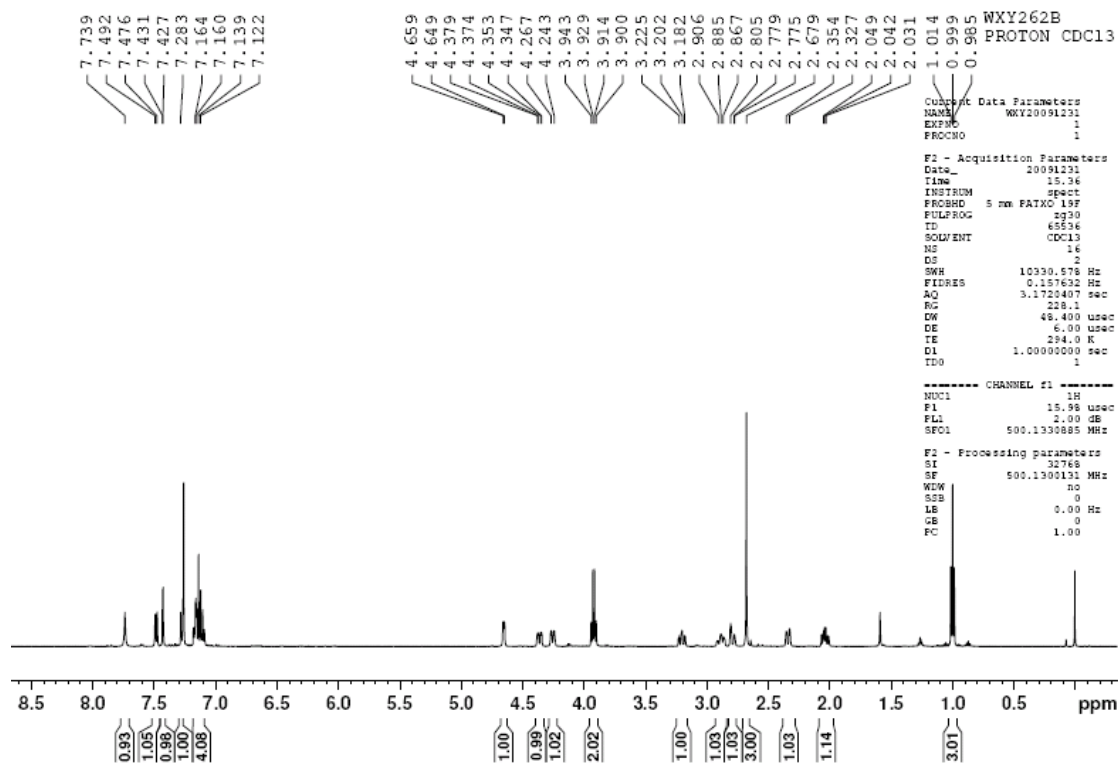

WXY262B C13  
C13CPD CDCl3

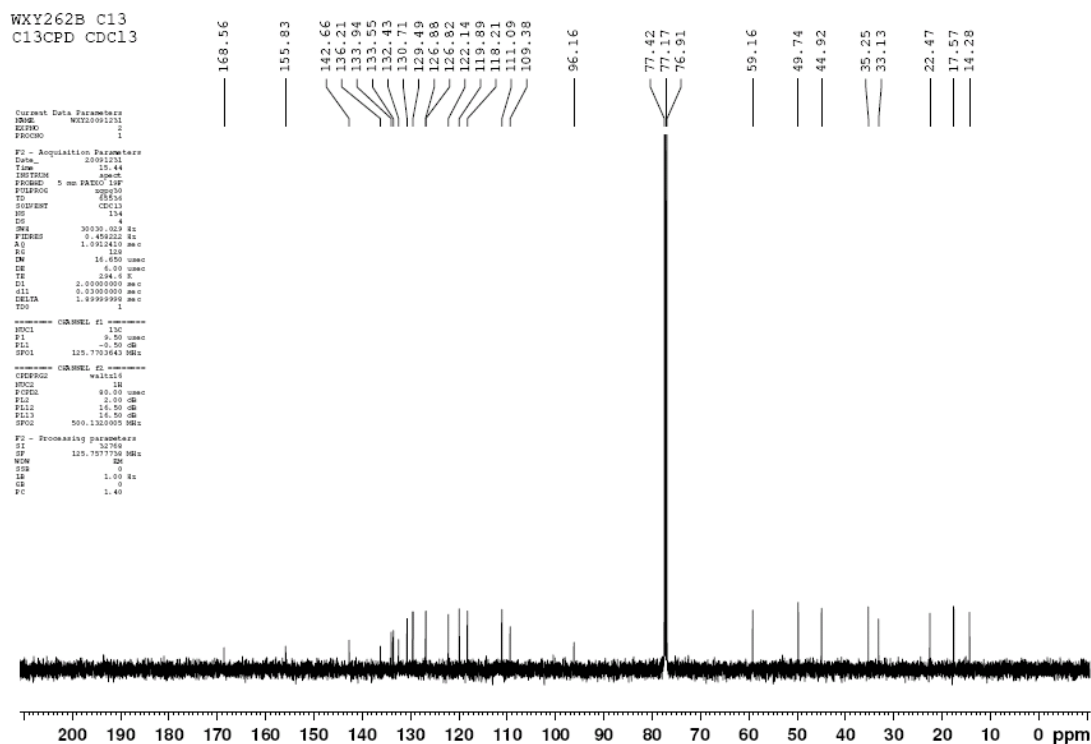

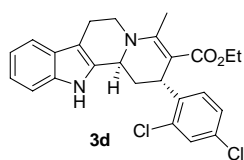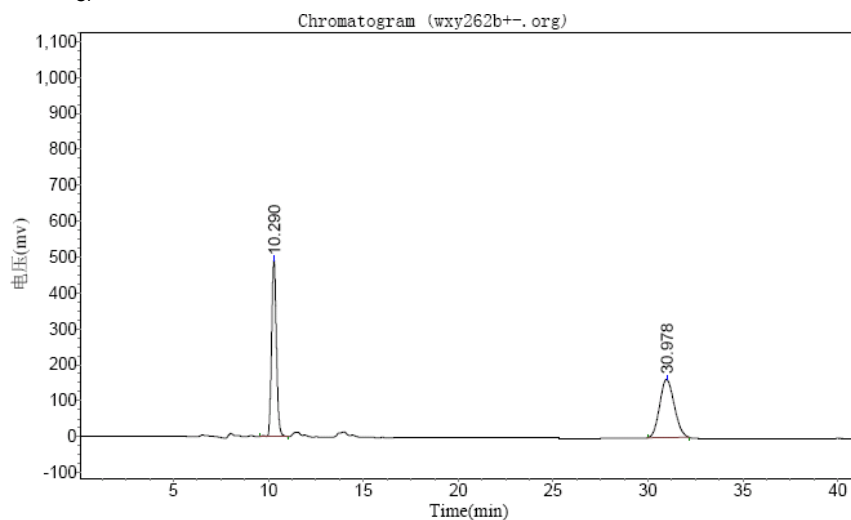

### Results

| Peak No. | Peak ID | Ret Time | Height     | Area         | Conc.    |
|----------|---------|----------|------------|--------------|----------|
| 1        |         | 10.290   | 491468.375 | 8622626.000  | 49.9362  |
| 2        |         | 30.978   | 161966.938 | 8644662.000  | 50.0638  |
| Total    |         |          | 653435.313 | 17267288.000 | 100.0000 |

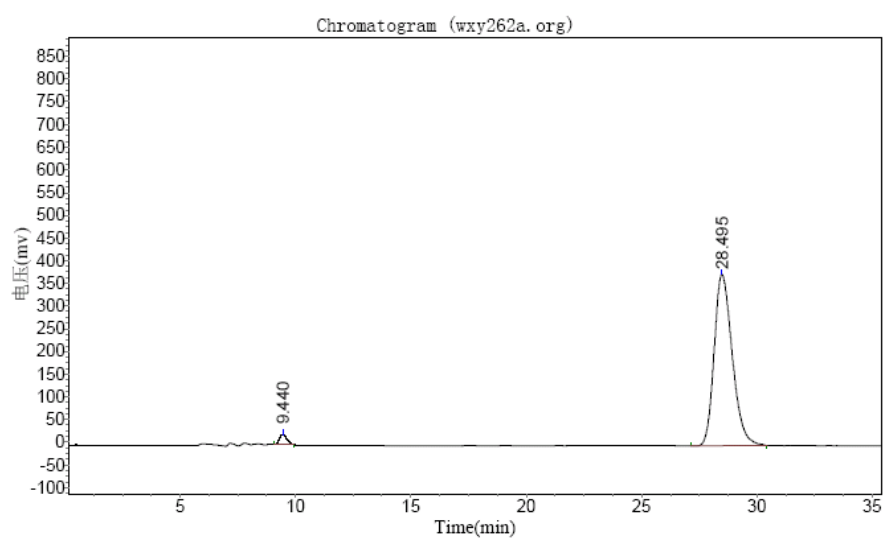

### Results

| Peak No. | Peak ID | Ret Time | Height     | Area         | Conc.    |
|----------|---------|----------|------------|--------------|----------|
| 1        |         | 9.440    | 22591.154  | 508269.688   | 2.3991   |
| 2        |         | 28.495   | 377960.875 | 20677882.000 | 97.6009  |
| Total    |         |          | 400552.029 | 21186151.688 | 100.0000 |

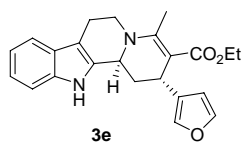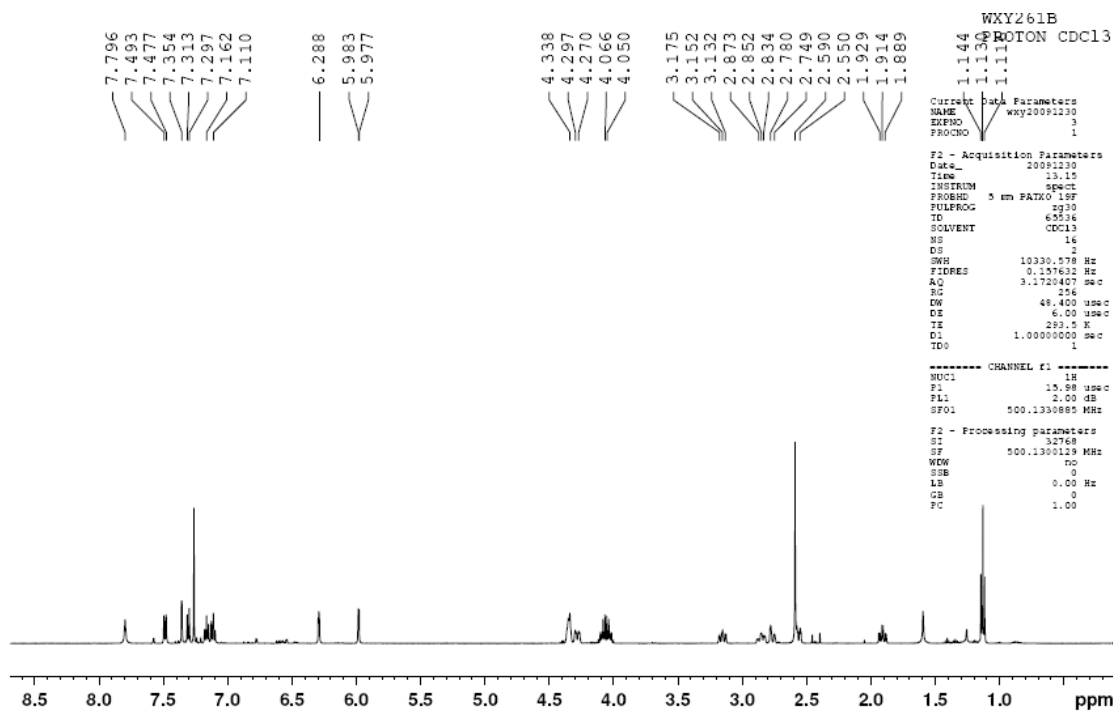

WXY261B C13  
C13CPD CDCl3

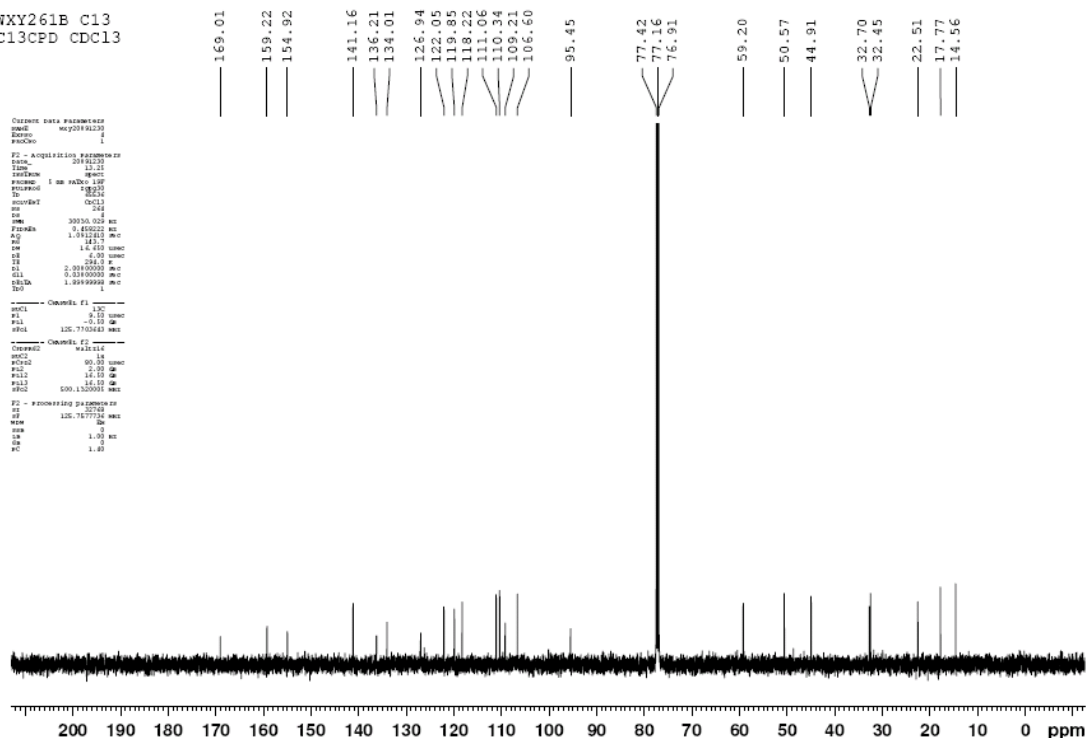

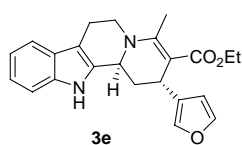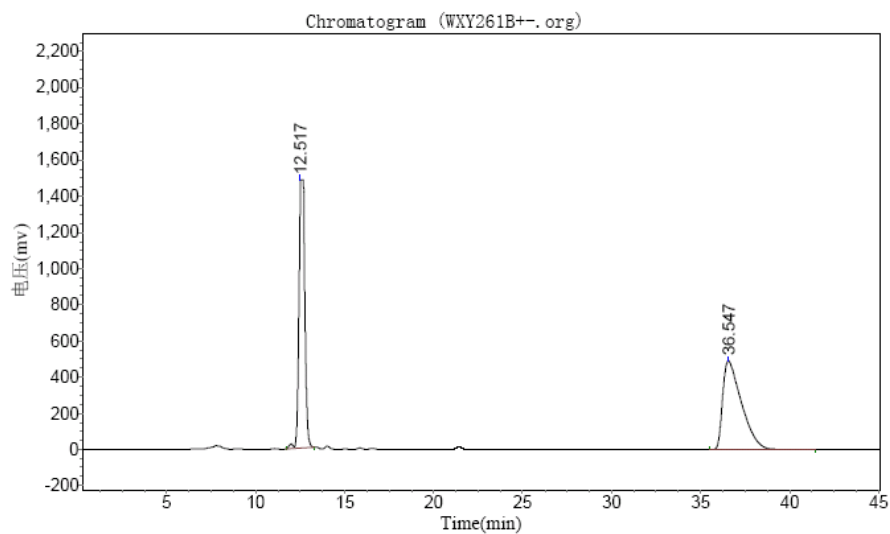

### Results

| Peak No. | Peak ID | Ret Time | Height      | Area         | Conc.    |
|----------|---------|----------|-------------|--------------|----------|
| 1        |         | 12.517   | 1480795.625 | 34284956.000 | 48.8683  |
| 2        |         | 36.547   | 490019.094  | 35872900.000 | 51.1317  |
| Total    |         |          | 1970814.719 | 70157856.000 | 100.0000 |

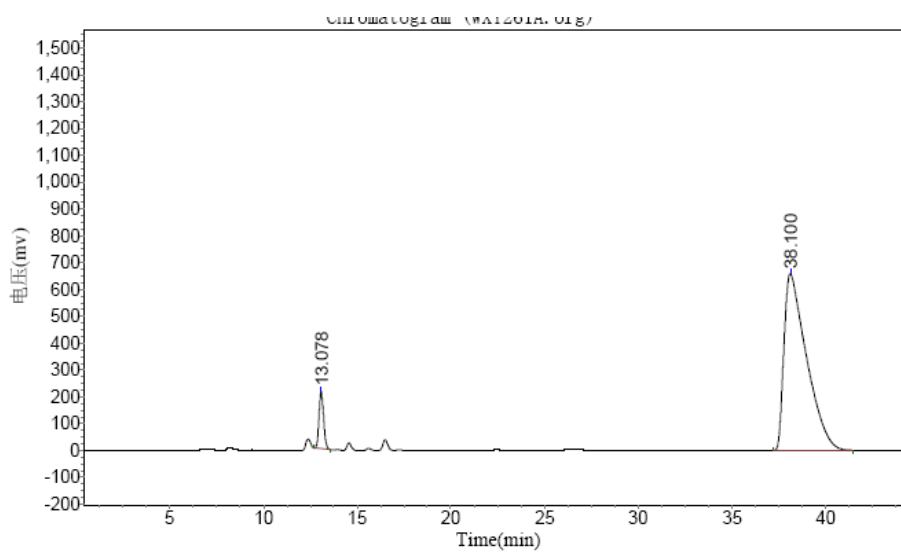

### Results

| Peak No. | Peak ID | Ret Time | Height     | Area         | Conc.    |
|----------|---------|----------|------------|--------------|----------|
| 1        |         | 13.078   | 213329.328 | 3629038.250  | 6.1879   |
| 2        |         | 38.100   | 658998.313 | 55018396.000 | 93.8121  |
| Total    |         |          | 872327.641 | 58647434.250 | 100.0000 |

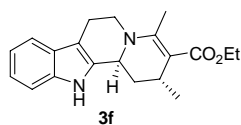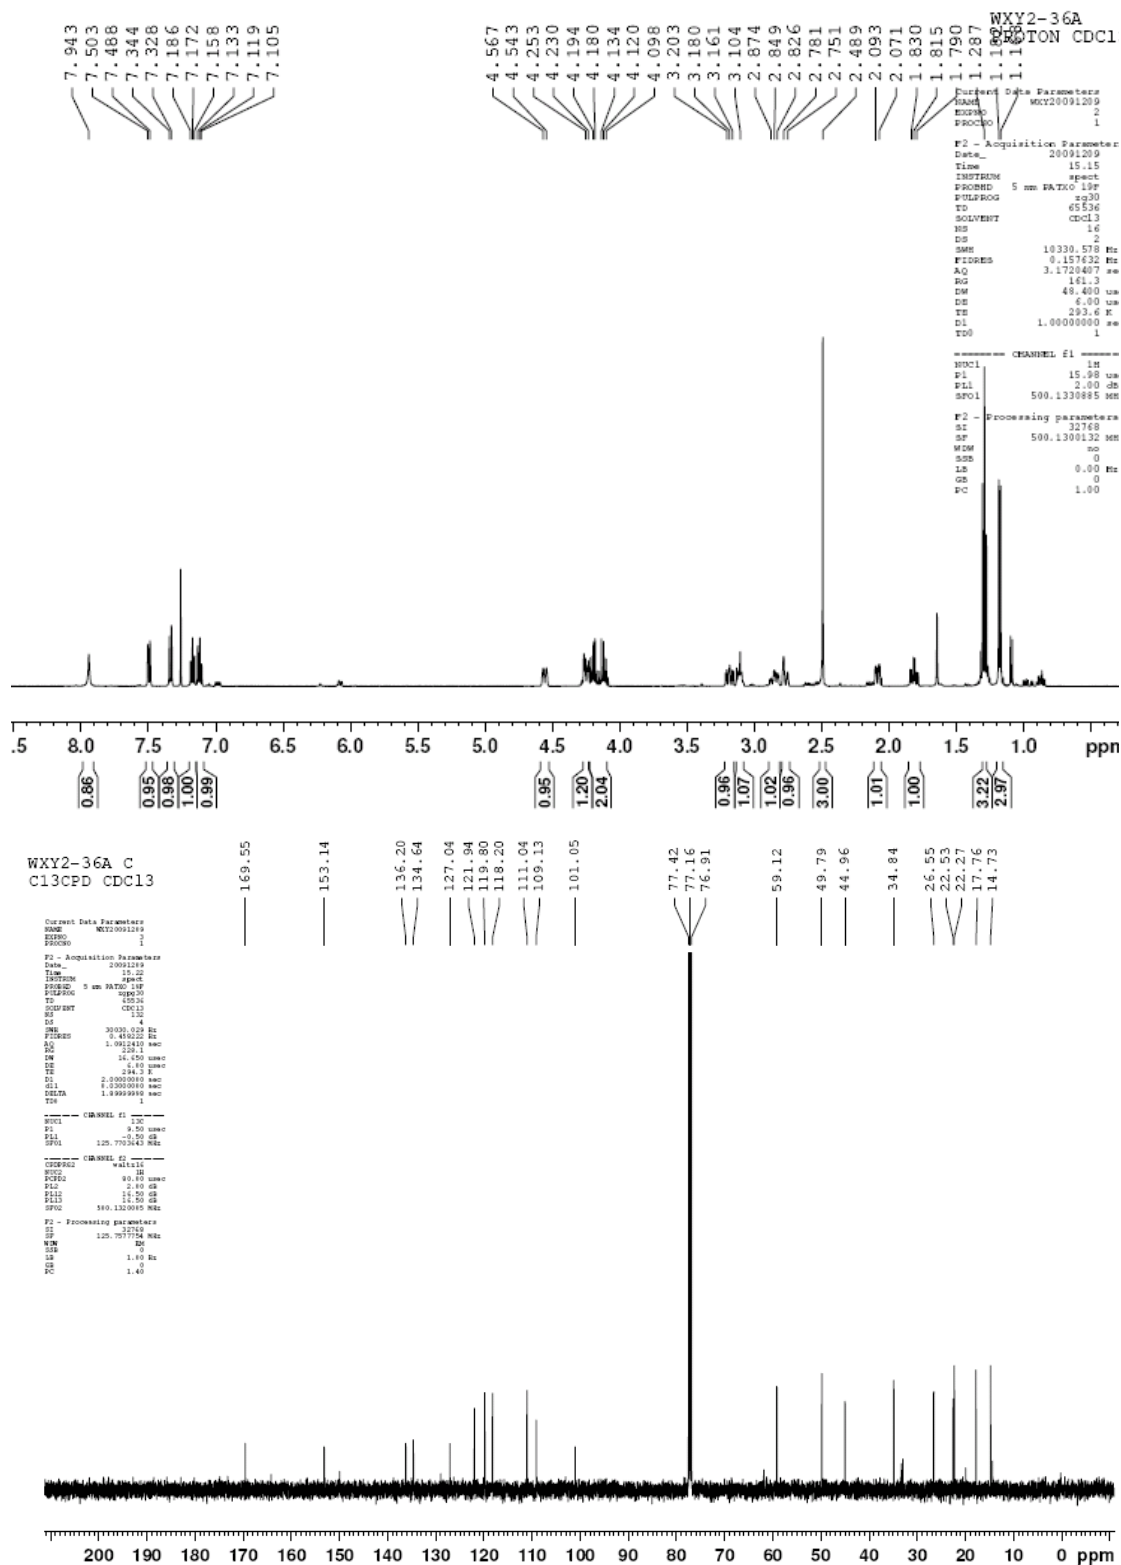

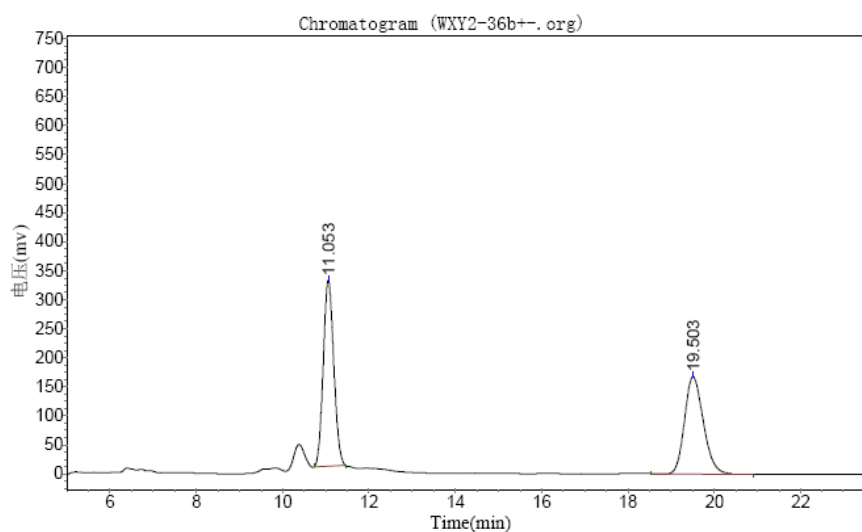

### Results

| Peak No. | Peak ID | Ret Time | Height     | Area         | Conc.    |
|----------|---------|----------|------------|--------------|----------|
| 1        |         | 11.053   | 320045.563 | 5401052.000  | 51.6955  |
| 2        |         | 19.503   | 167341.031 | 5046762.000  | 48.3045  |
| Total    |         |          | 487386.594 | 10447814.000 | 100.0000 |

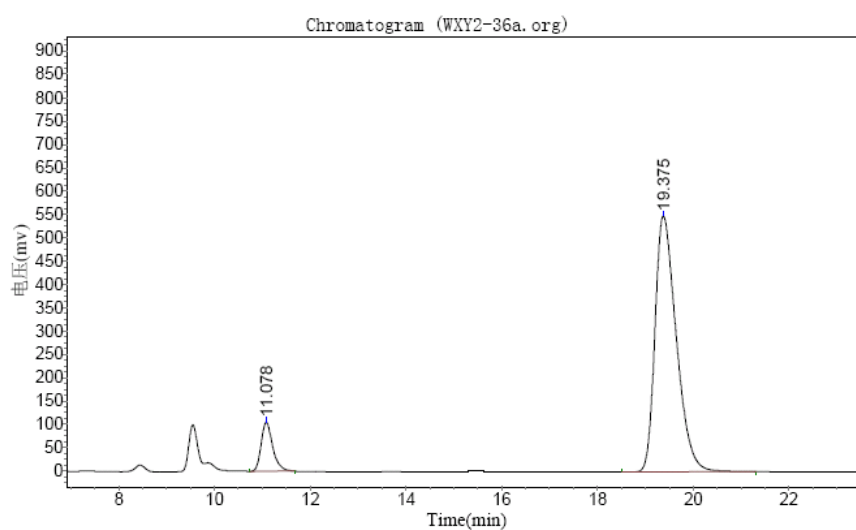

### Results

| Peak No. | Peak ID | Ret Time | Height     | Area         | Conc.    |
|----------|---------|----------|------------|--------------|----------|
| 1        |         | 11.078   | 104756.438 | 1758797.375  | 9.3884   |
| 2        |         | 19.375   | 548933.250 | 16974906.000 | 90.6116  |
| Total    |         |          | 653689.688 | 18733703.375 | 100.0000 |

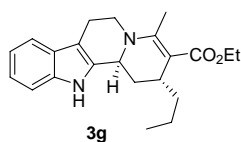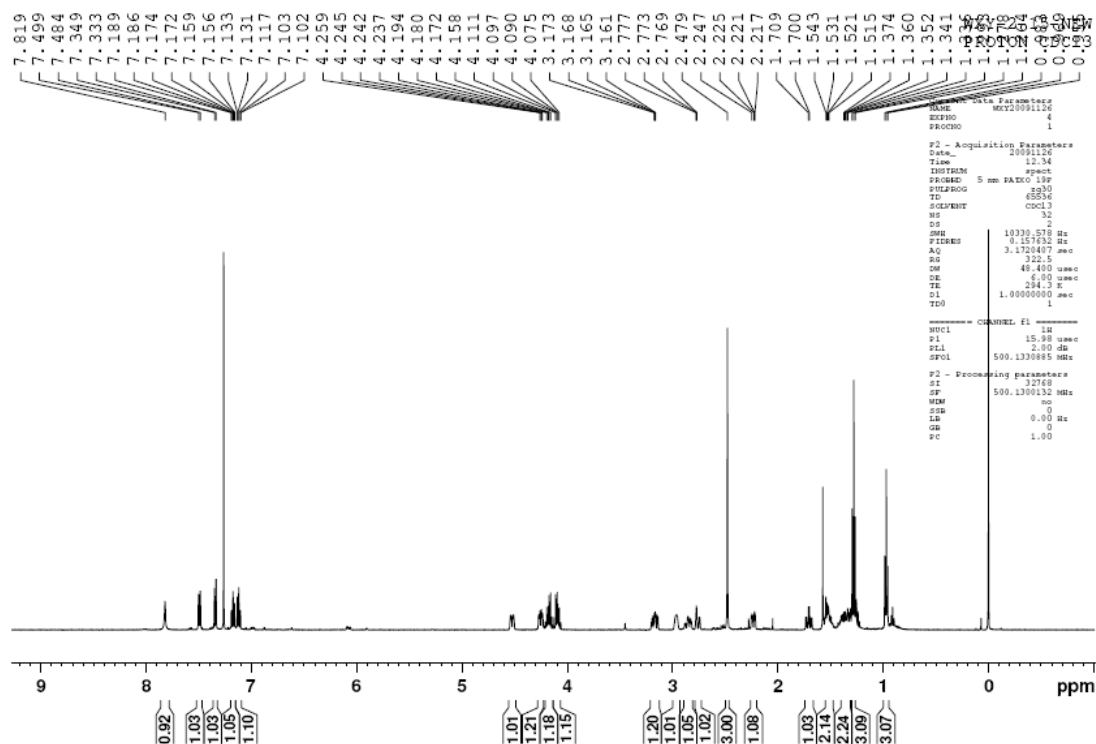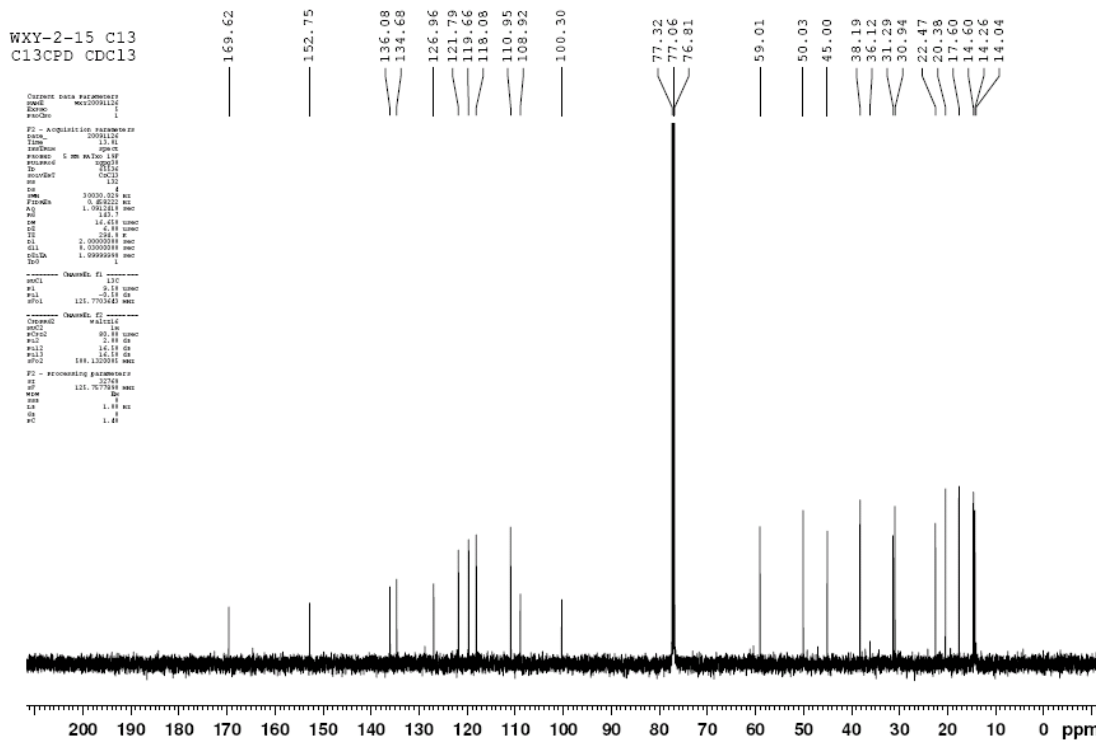

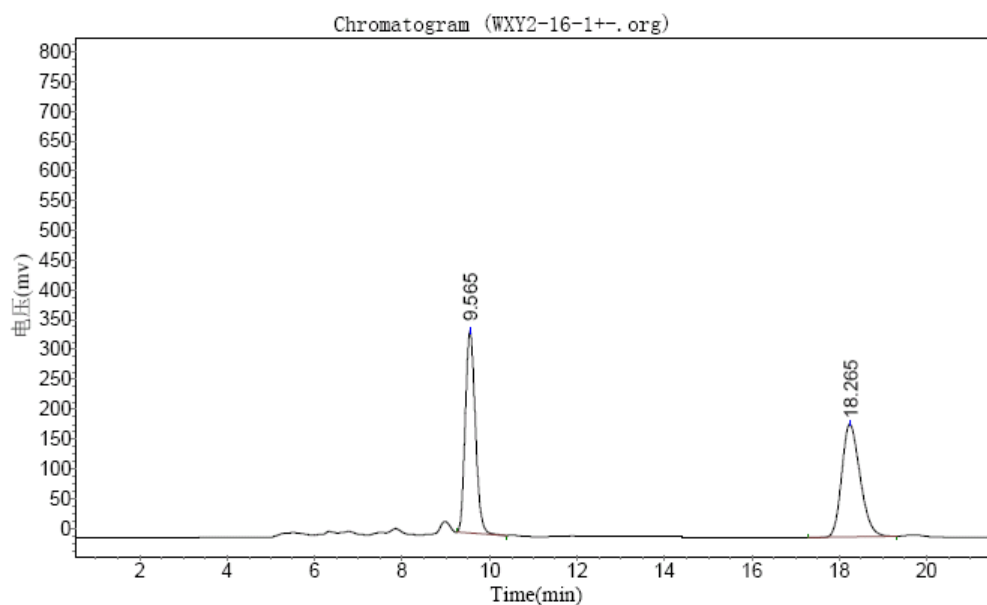

### Results

| Peak ID | Ret Time | Height     | Area         | Conc.    |
|---------|----------|------------|--------------|----------|
|         | 9.565    | 345203.906 | 5828632.500  | 50.7954  |
|         | 18.265   | 189737.922 | 5646092.500  | 49.2046  |
|         |          | 534941.828 | 11474725.000 | 100.0000 |

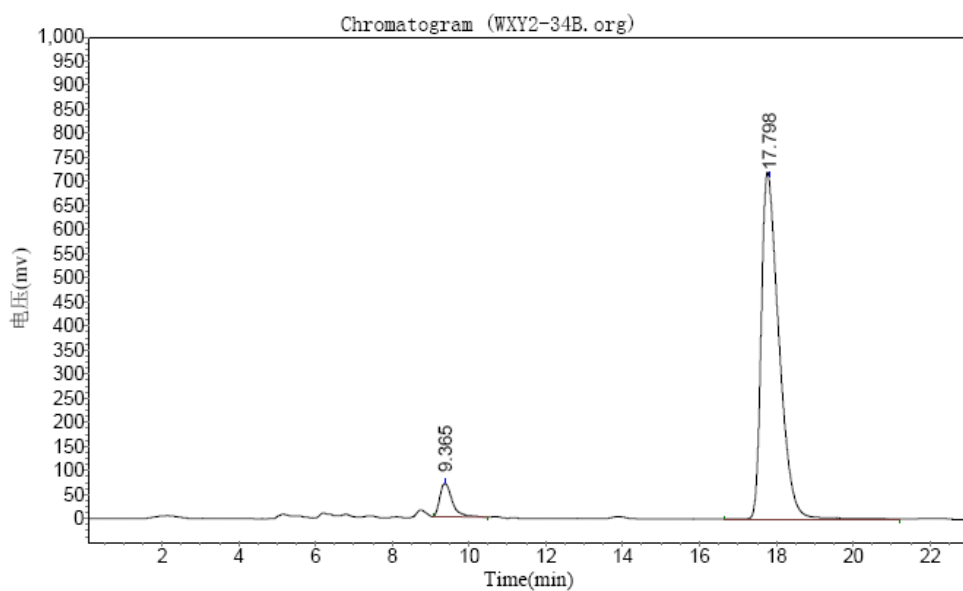

### Results

| Peak ID | Ret Time | Height     | Area         | Conc.    |
|---------|----------|------------|--------------|----------|
|         | 9.365    | 73574.047  | 1915280.875  | 7.7127   |
|         | 17.798   | 717168.813 | 22917378.000 | 92.2873  |
|         |          | 790742.859 | 24832658.875 | 100.0000 |





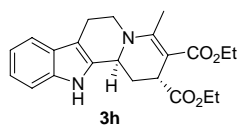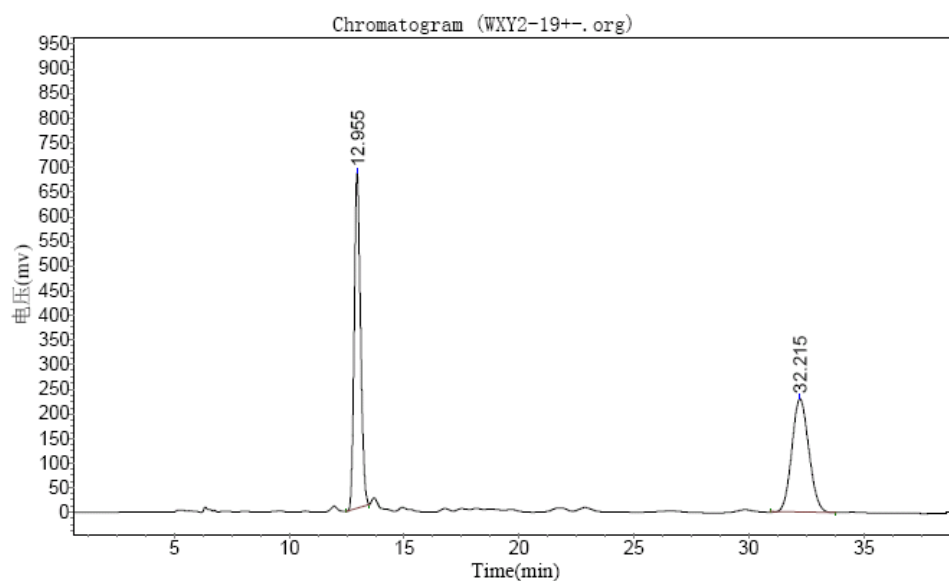

### Results

| Peak ID | Ret Time | Height     | Area         | Conc.    |
|---------|----------|------------|--------------|----------|
|         | 12.955   | 680230.563 | 13009961.000 | 52.4020  |
|         | 32.215   | 230055.875 | 11817257.000 | 47.5980  |
|         |          | 910286.438 | 24827218.000 | 100.0000 |

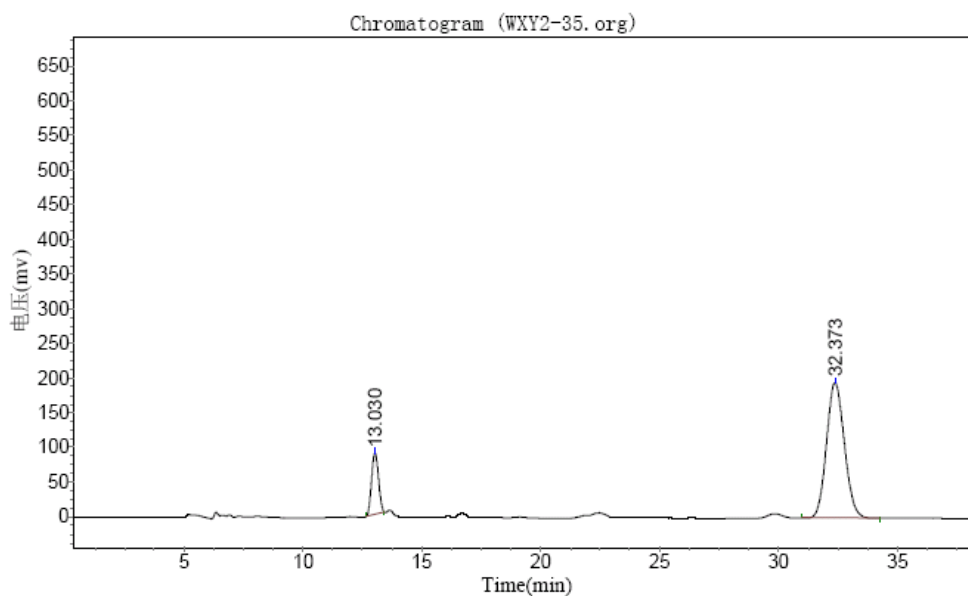

### Results

| Peak ID | Ret Time | Height     | Area         | Conc.    |
|---------|----------|------------|--------------|----------|
|         | 13.030   | 88502.859  | 1798164.500  | 15.0449  |
|         | 32.373   | 195223.328 | 10153804.000 | 84.9551  |
|         |          | 283726.188 | 11951968.500 | 100.0000 |

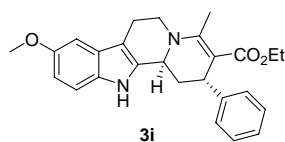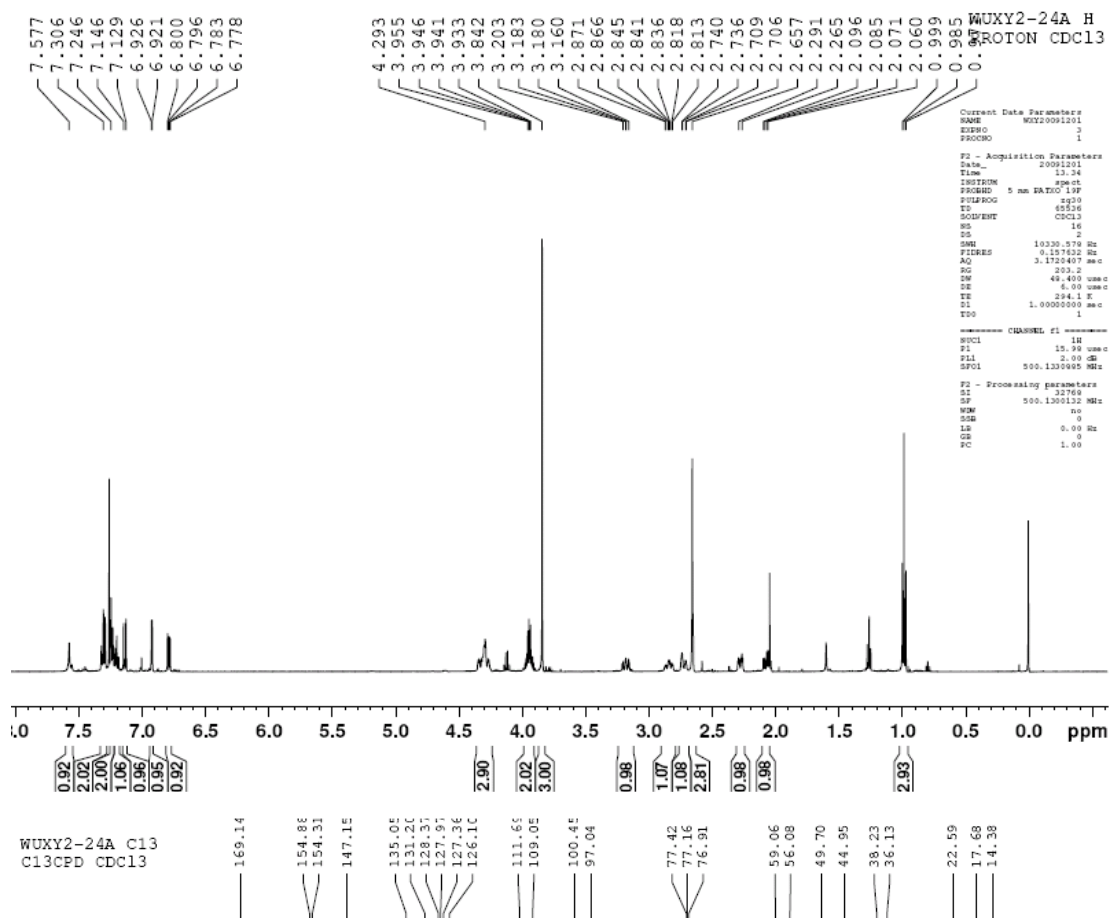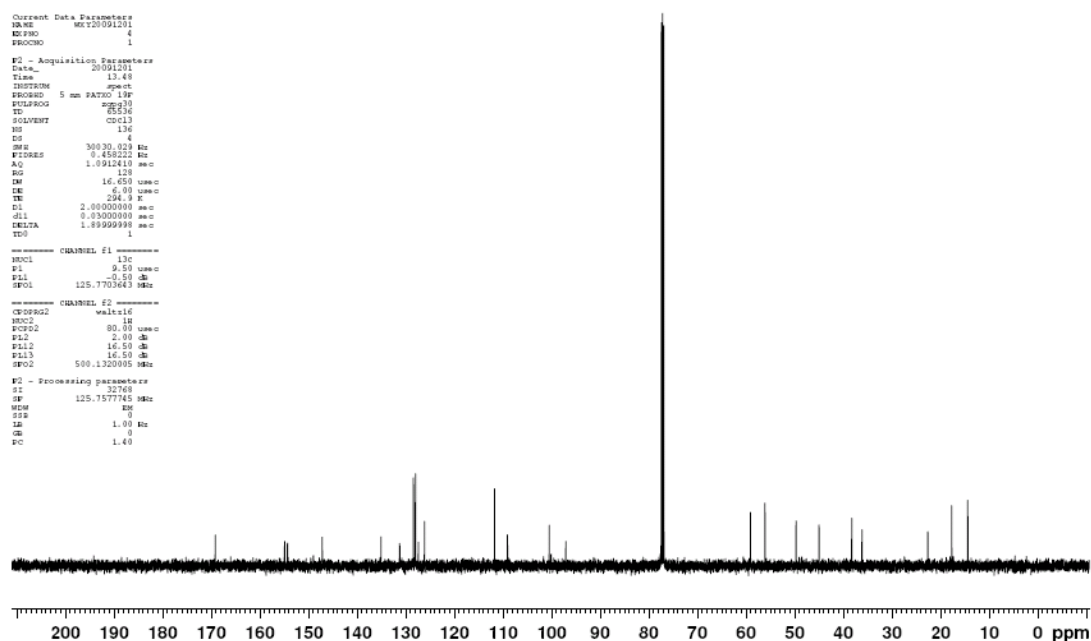

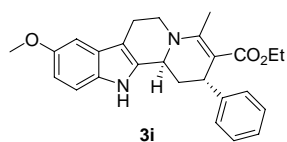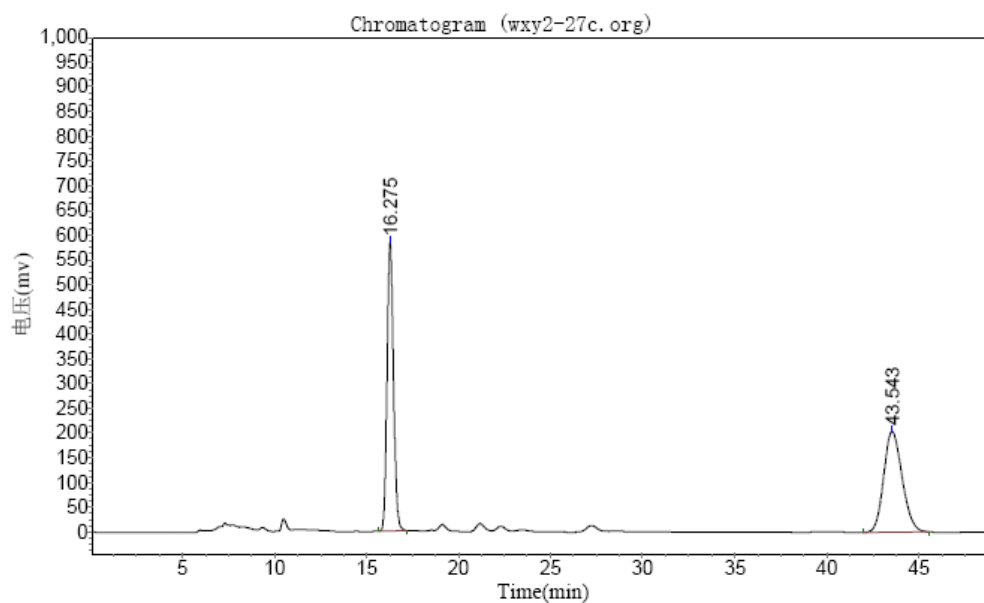

### Results

| Peak ID | Ret Time | Height     | Area         | Conc.    |
|---------|----------|------------|--------------|----------|
|         | 16.275   | 583587.938 | 14128806.000 | 49.9025  |
|         | 43.543   | 203547.875 | 14183990.000 | 50.0975  |
|         |          | 787135.813 | 28312796.000 | 100.0000 |

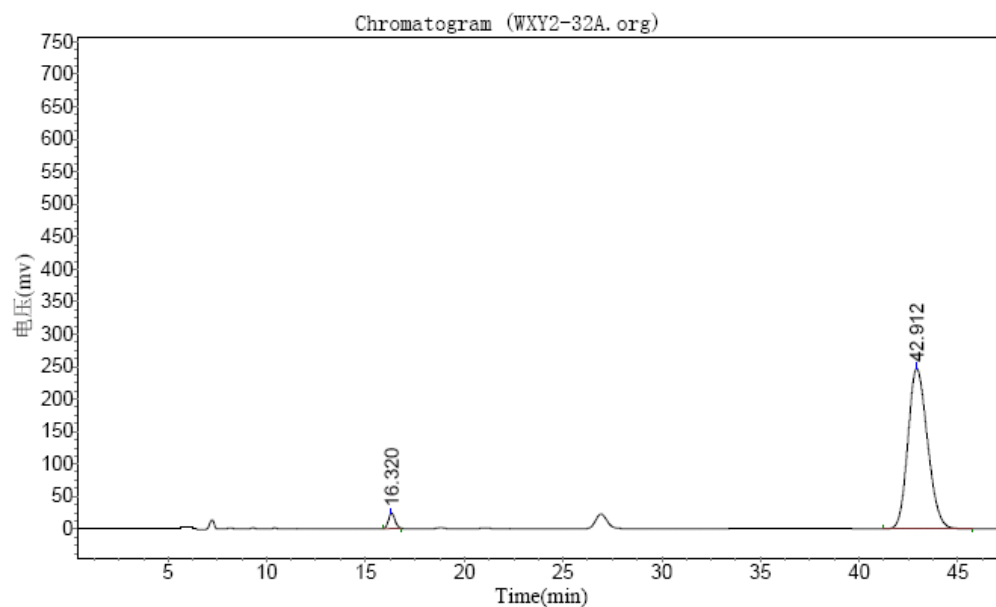

### Results

| Peak ID | Ret Time | Height     | Area         | Conc.    |
|---------|----------|------------|--------------|----------|
|         | 16.320   | 23443.834  | 531187.500   | 3.0053   |
|         | 42.912   | 247497.219 | 17143704.000 | 96.9947  |
|         |          | 270941.053 | 17674891.500 | 100.0000 |

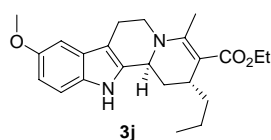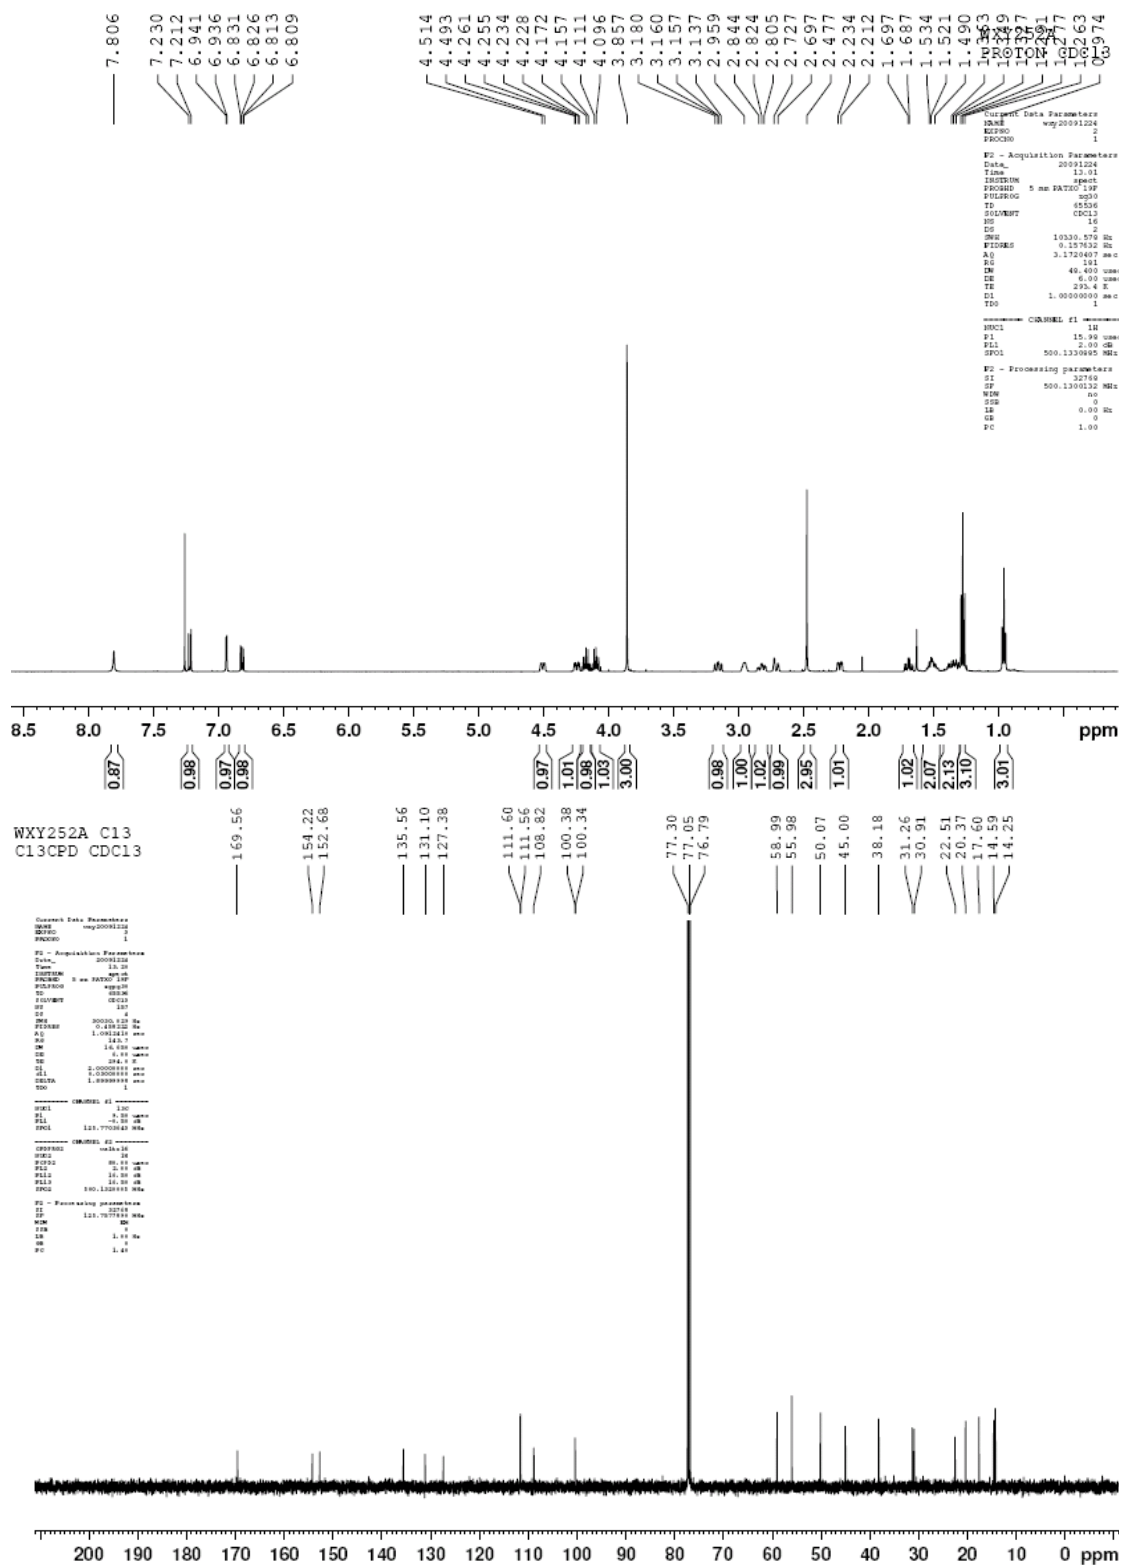

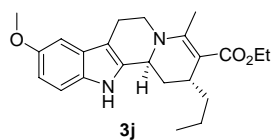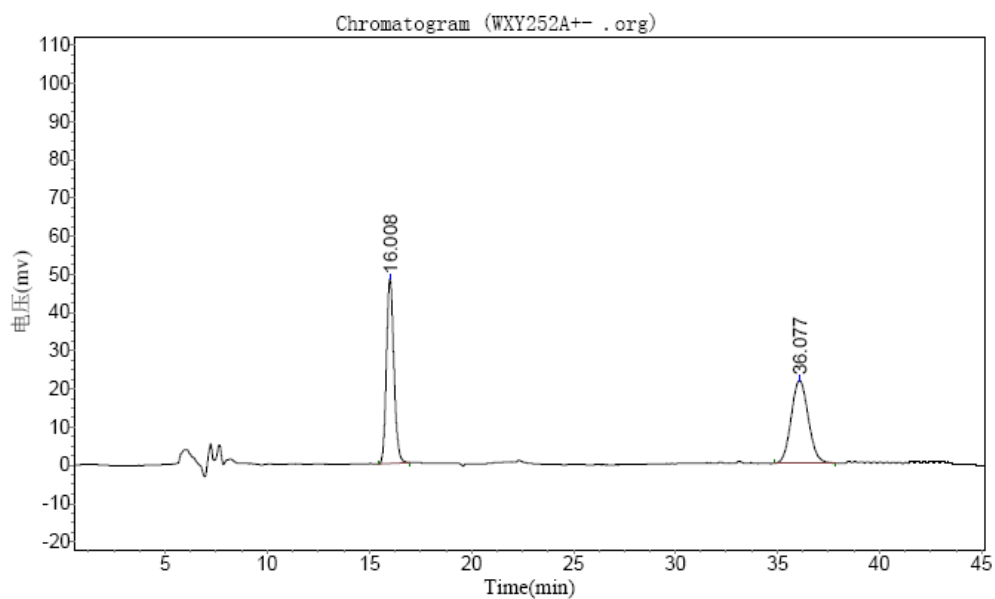

### Results

| Peak ID | Ret Time | Height    | Area        | Conc.    |
|---------|----------|-----------|-------------|----------|
|         | 16.008   | 48183.598 | 1219790.000 | 49.0305  |
|         | 36.077   | 21746.527 | 1268027.250 | 50.9695  |
|         |          | 69930.125 | 2487817.250 | 100.0000 |

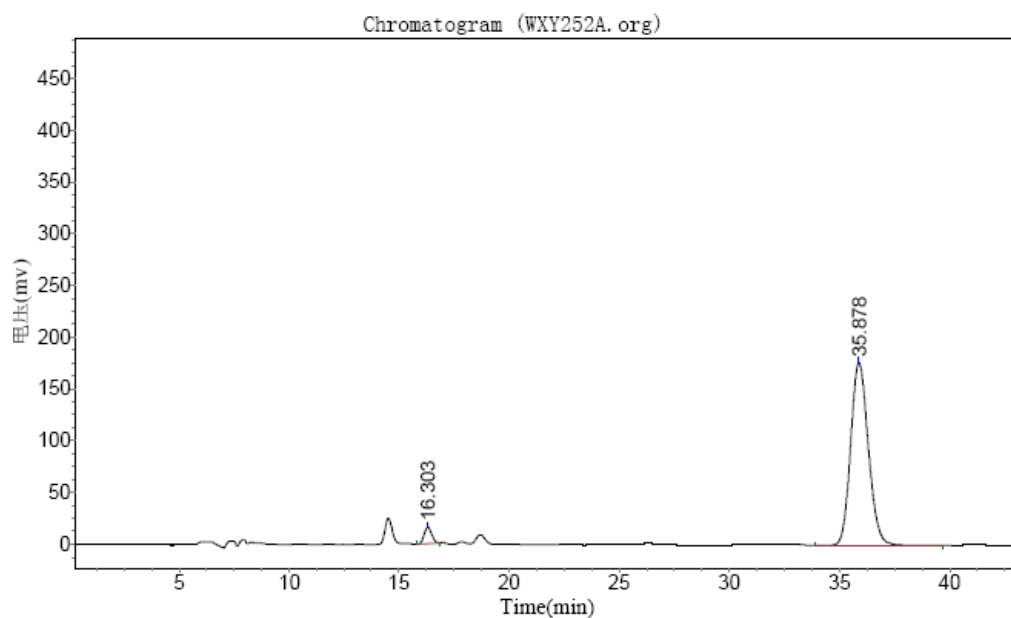

### Results

| Peak ID | Ret Time | Height     | Area         | Conc.    |
|---------|----------|------------|--------------|----------|
|         | 16.303   | 15853.293  | 376273.813   | 3.6692   |
|         | 35.878   | 176466.641 | 9878745.000  | 96.3308  |
|         |          | 192319.934 | 10255018.813 | 100.0000 |

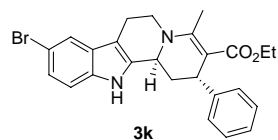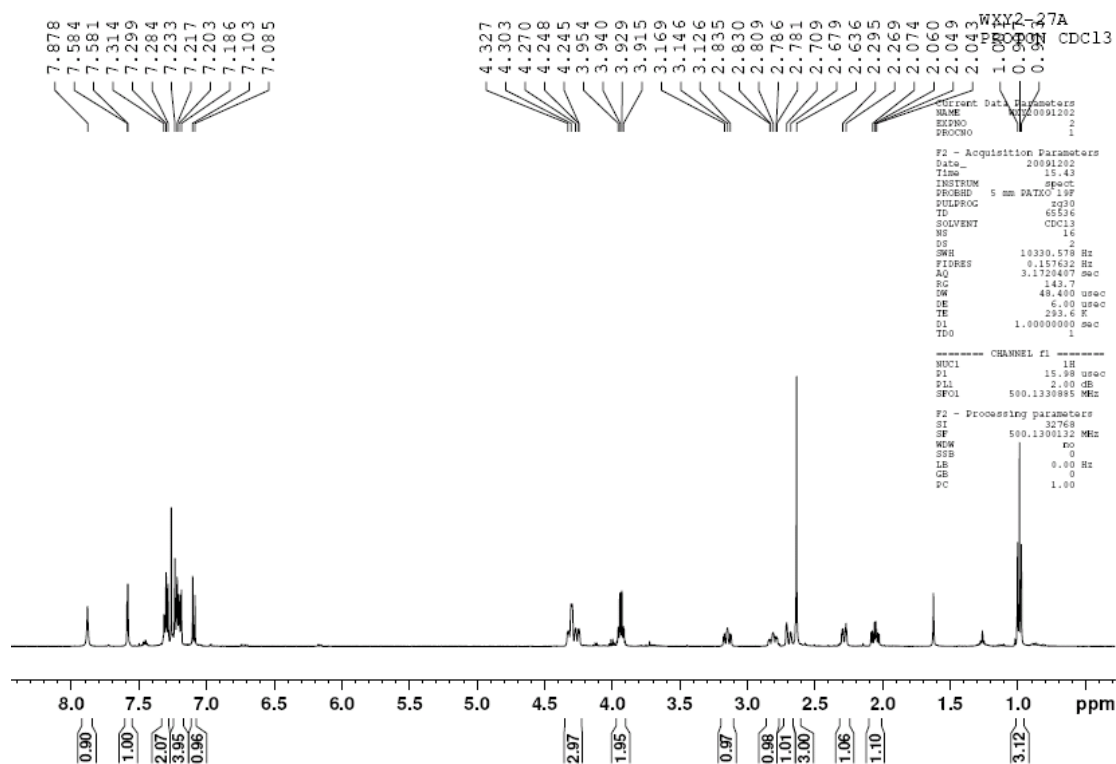

WXY2-27A  
C13CPD CDC13

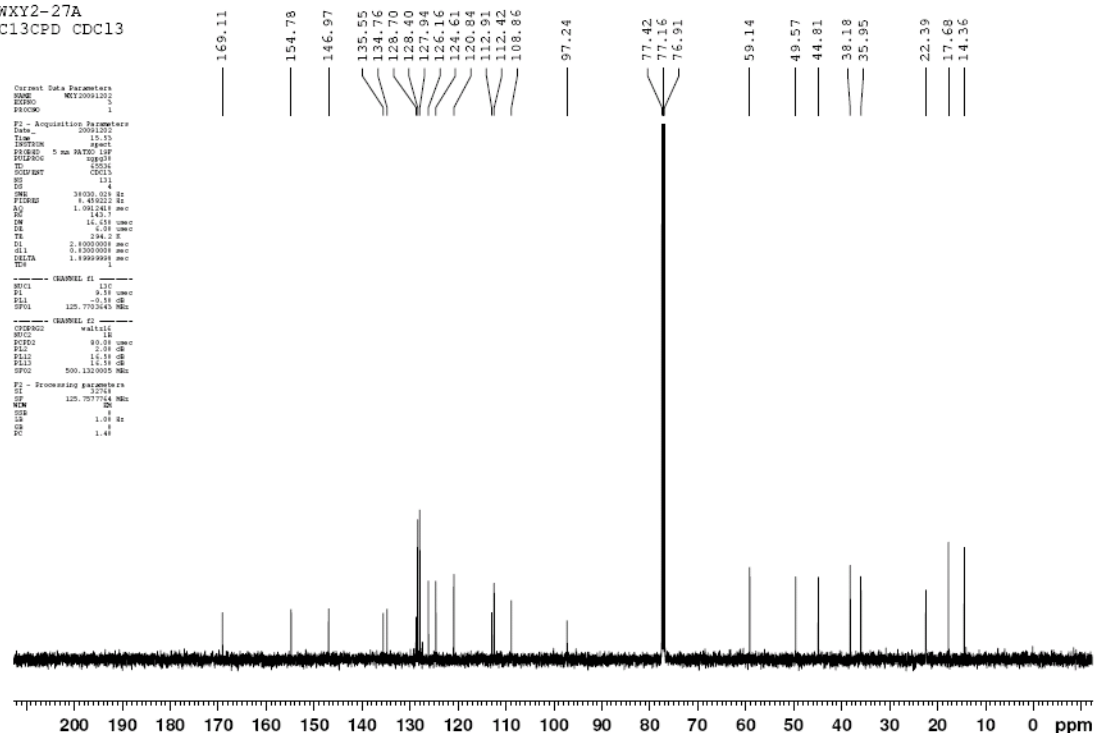

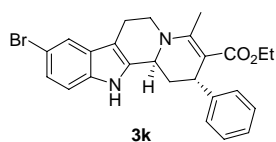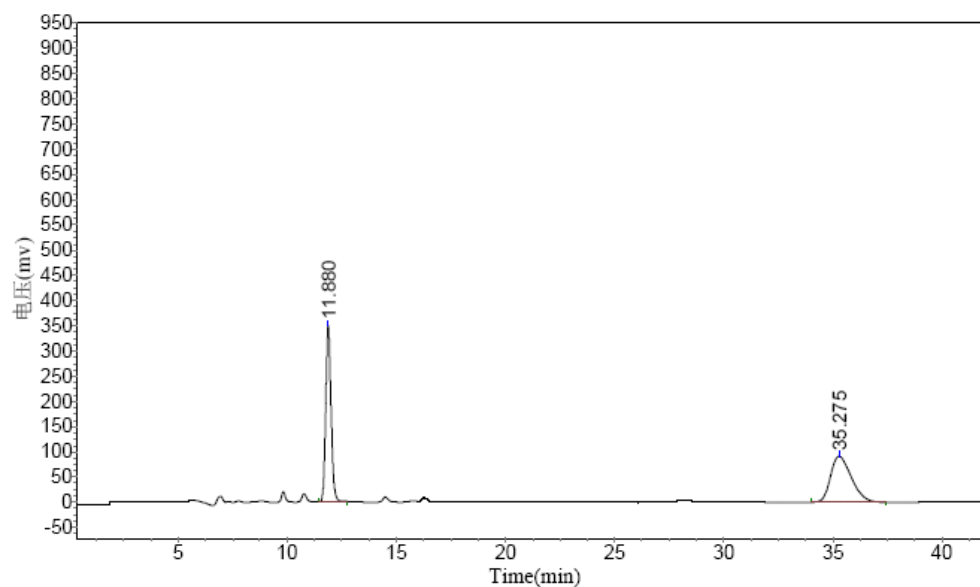

### Results

| Peak ID | Ret Time | Height     | Area         | Conc.    |
|---------|----------|------------|--------------|----------|
|         | 11.880   | 349567.094 | 5976516.000  | 49.8360  |
|         | 35.275   | 90973.883  | 6015850.500  | 50.1640  |
|         |          | 440540.977 | 11992366.500 | 100.0000 |

Chromatogram (wxy2-32b new.org)

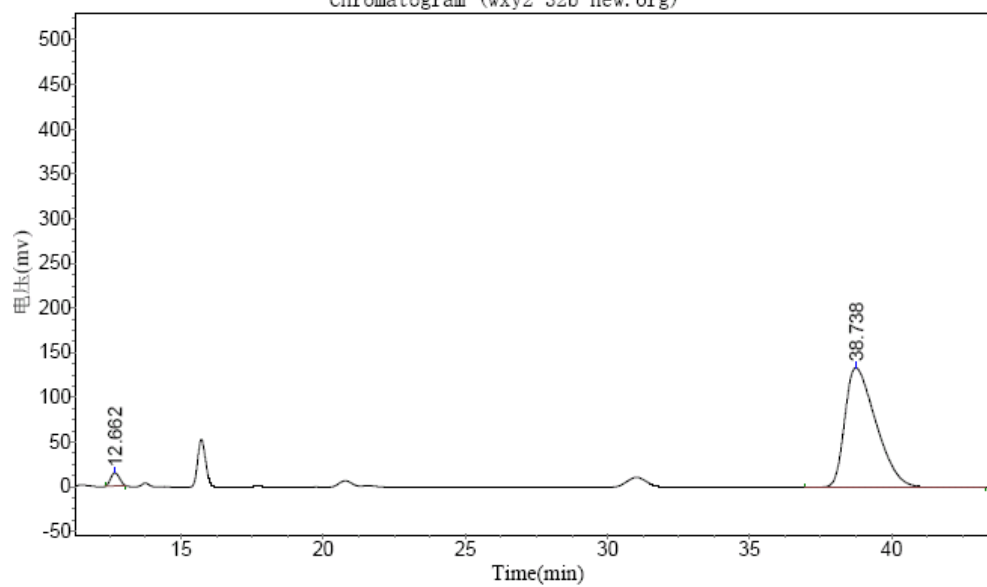

### Results

| Peak ID | Ret Time | Height     | Area         | Conc.    |
|---------|----------|------------|--------------|----------|
|         | 12.662   | 14737.358  | 319092.406   | 3.0196   |
|         | 38.738   | 134027.313 | 10248239.000 | 96.9804  |
|         |          | 148764.671 | 10567331.406 | 100.0000 |



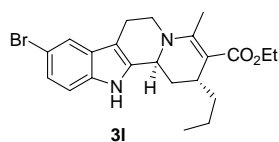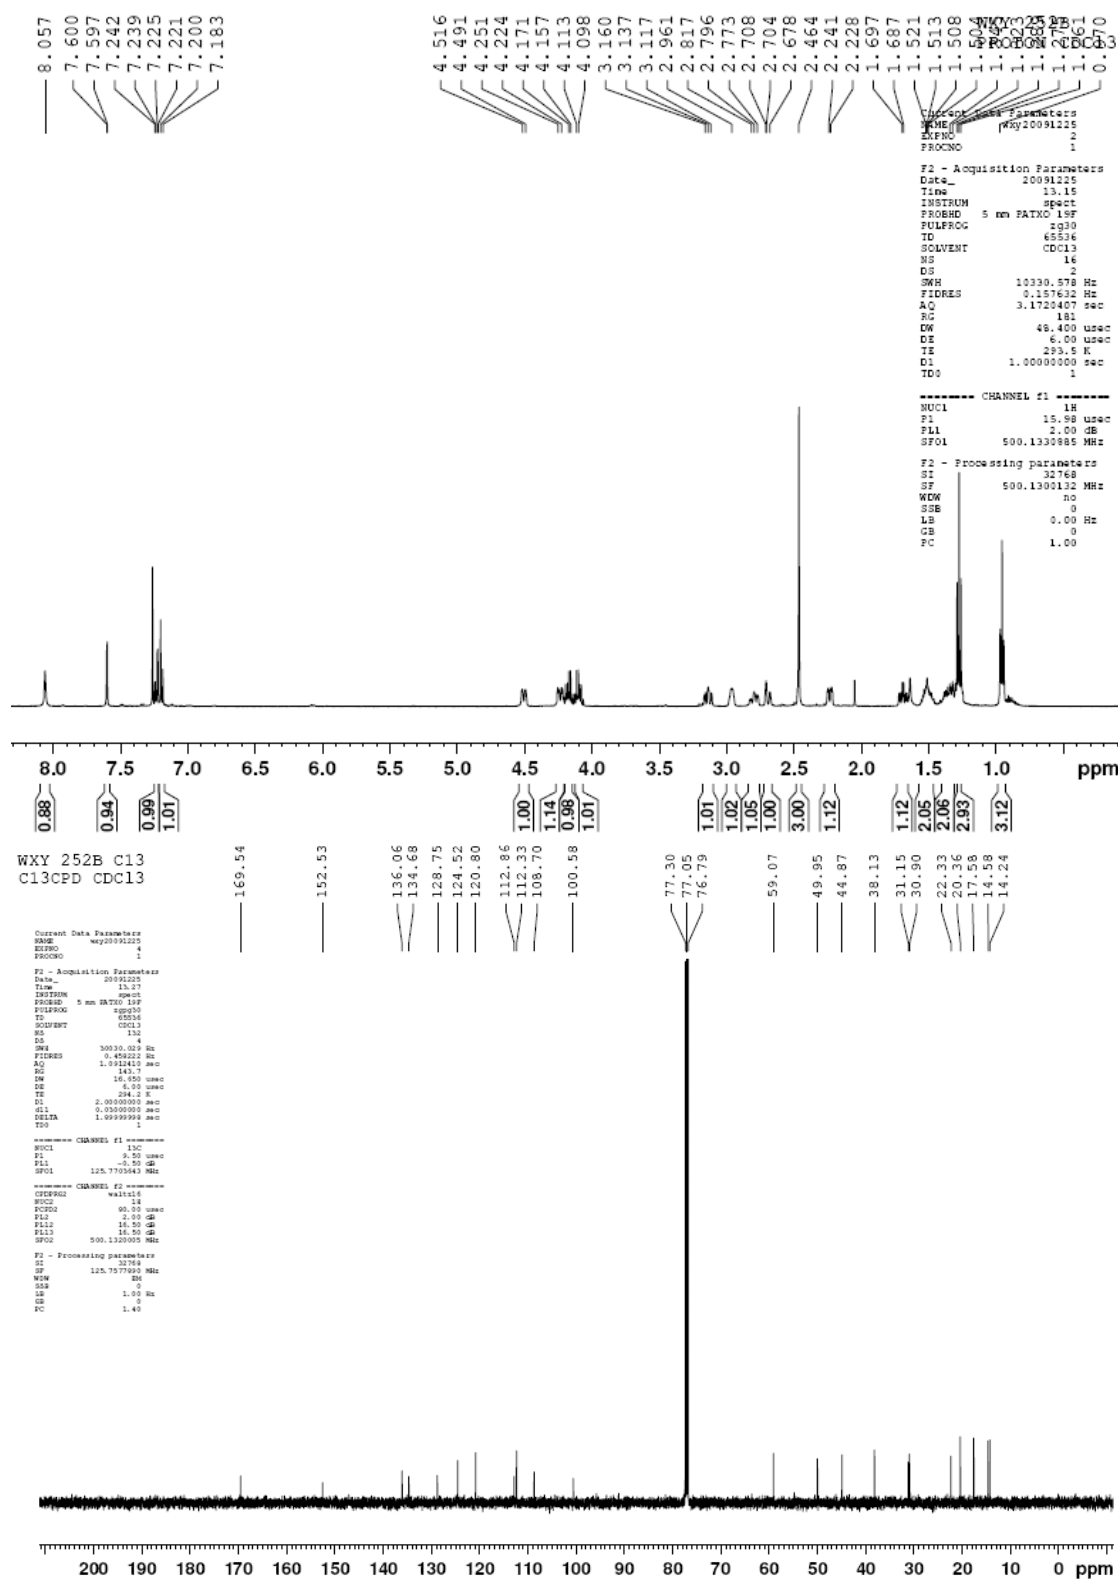

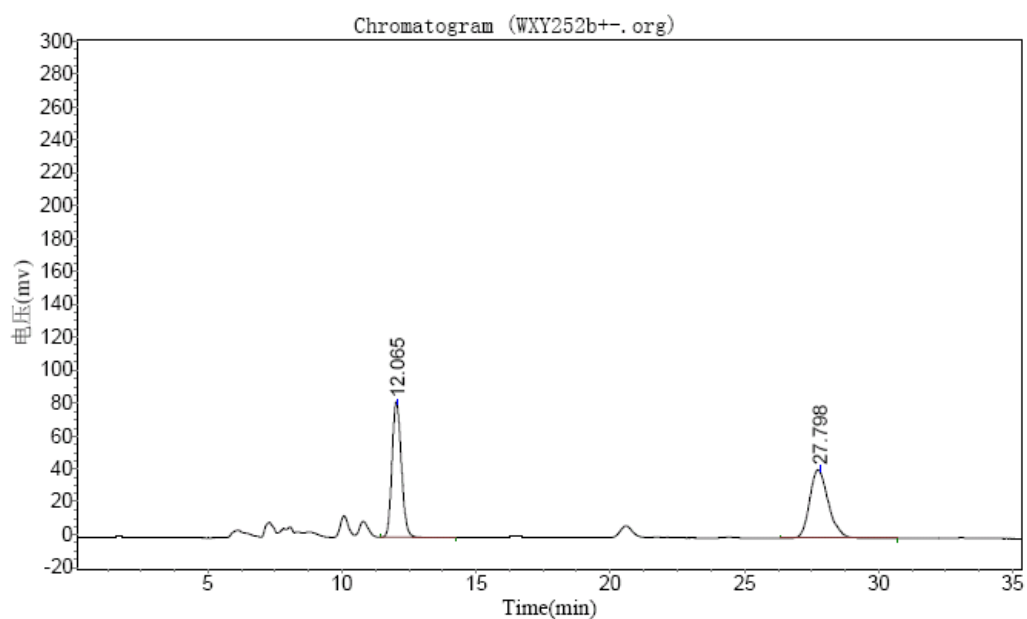

### Results

| Peak ID | Ret Time | Height     | Area        | Conc.    |
|---------|----------|------------|-------------|----------|
|         | 12.065   | 82431.680  | 2081647.375 | 49.9454  |
|         | 27.798   | 41552.148  | 2086199.750 | 50.0546  |
|         |          | 123983.828 | 4167847.125 | 100.0000 |

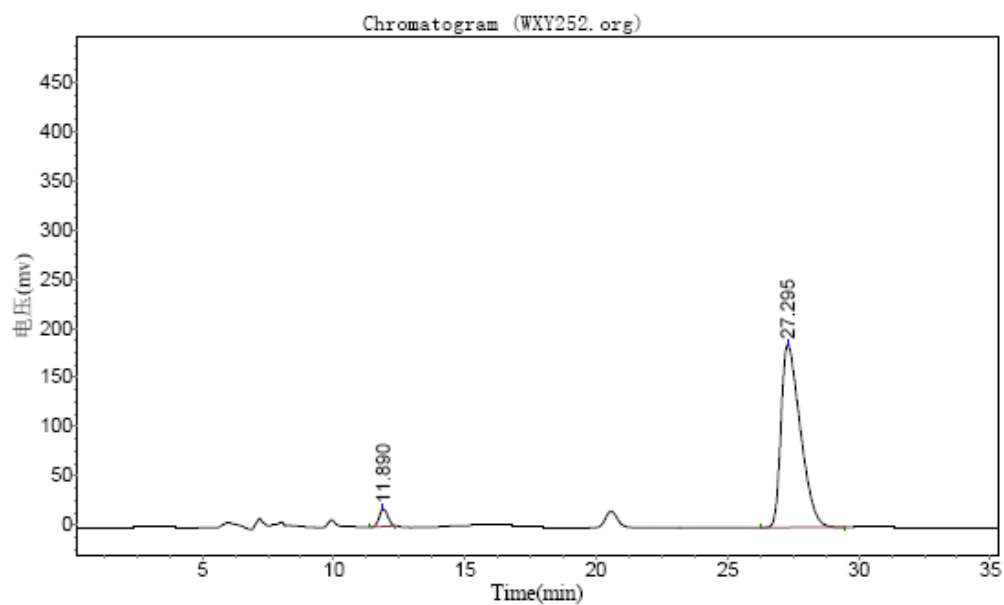

### Results

| Peak ID | Ret Time | Height     | Area        | Conc.    |
|---------|----------|------------|-------------|----------|
|         | 11.890   | 17737.182  | 399702.188  | 4.0456   |
|         | 27.295   | 185627.391 | 9480238.000 | 95.9544  |
|         |          | 203364.572 | 9879940.188 | 100.0000 |

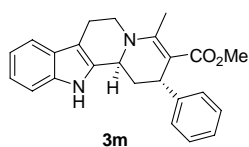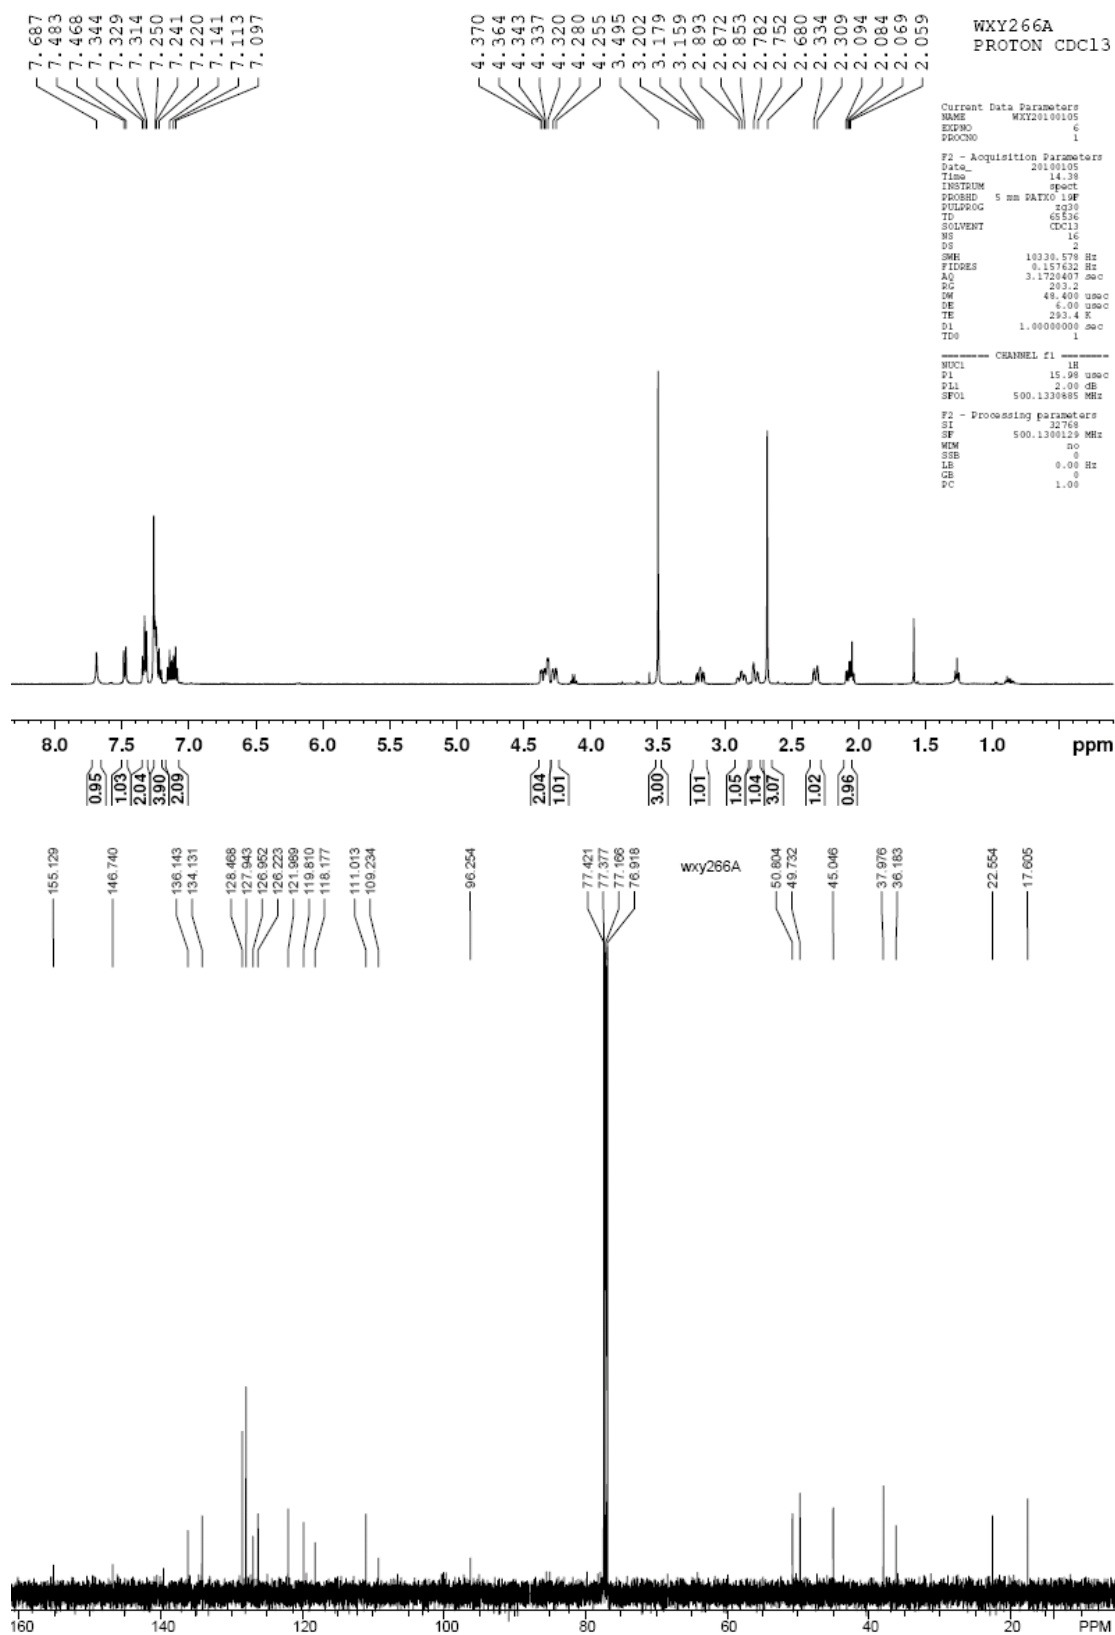

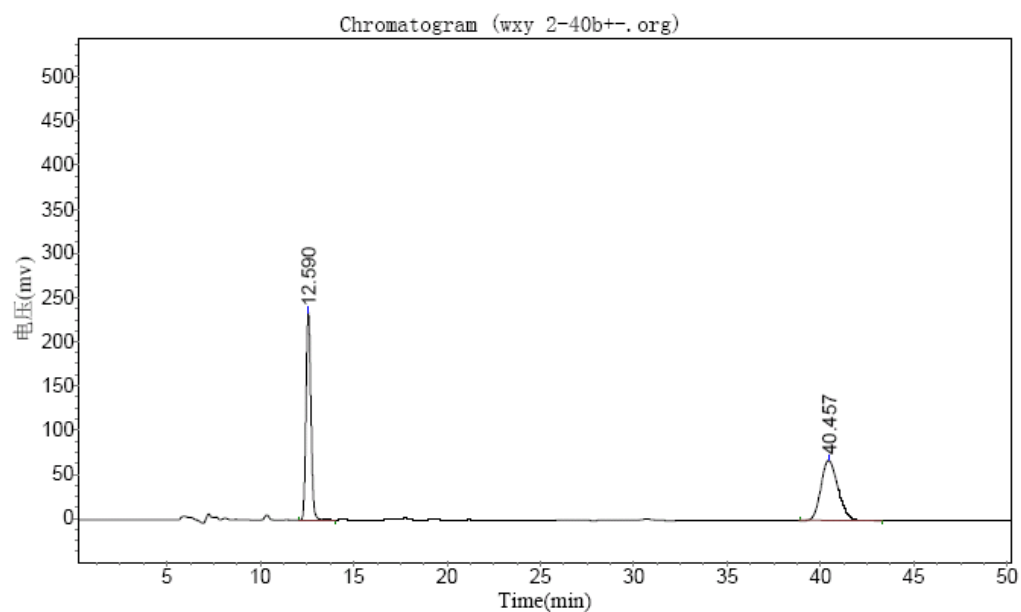

### Results

| Peak ID | Ret Time | Height     | Area        | Conc.    |
|---------|----------|------------|-------------|----------|
|         | 12.590   | 234035.969 | 4313317.000 | 49.5764  |
|         | 40.457   | 68382.773  | 4387030.500 | 50.4236  |
|         |          | 302418.742 | 8700347.500 | 100.0000 |

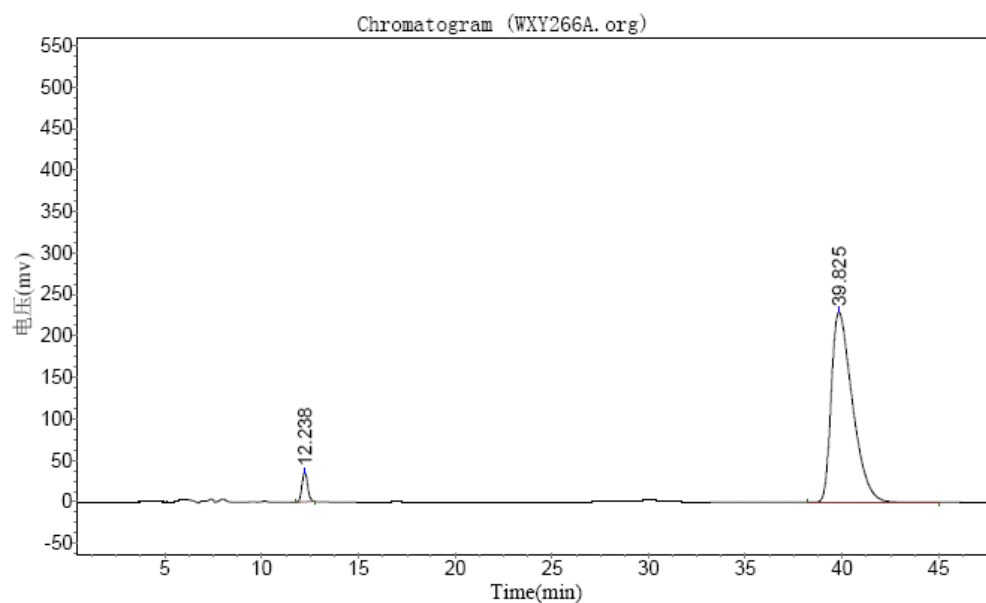

### Results

| Peak ID | Ret Time | Height     | Area         | Conc.    |
|---------|----------|------------|--------------|----------|
|         | 12.238   | 35515.270  | 721684.188   | 3.9736   |
|         | 39.825   | 229514.078 | 17440088.000 | 96.0264  |
|         |          | 265029.348 | 18161772.188 | 100.0000 |

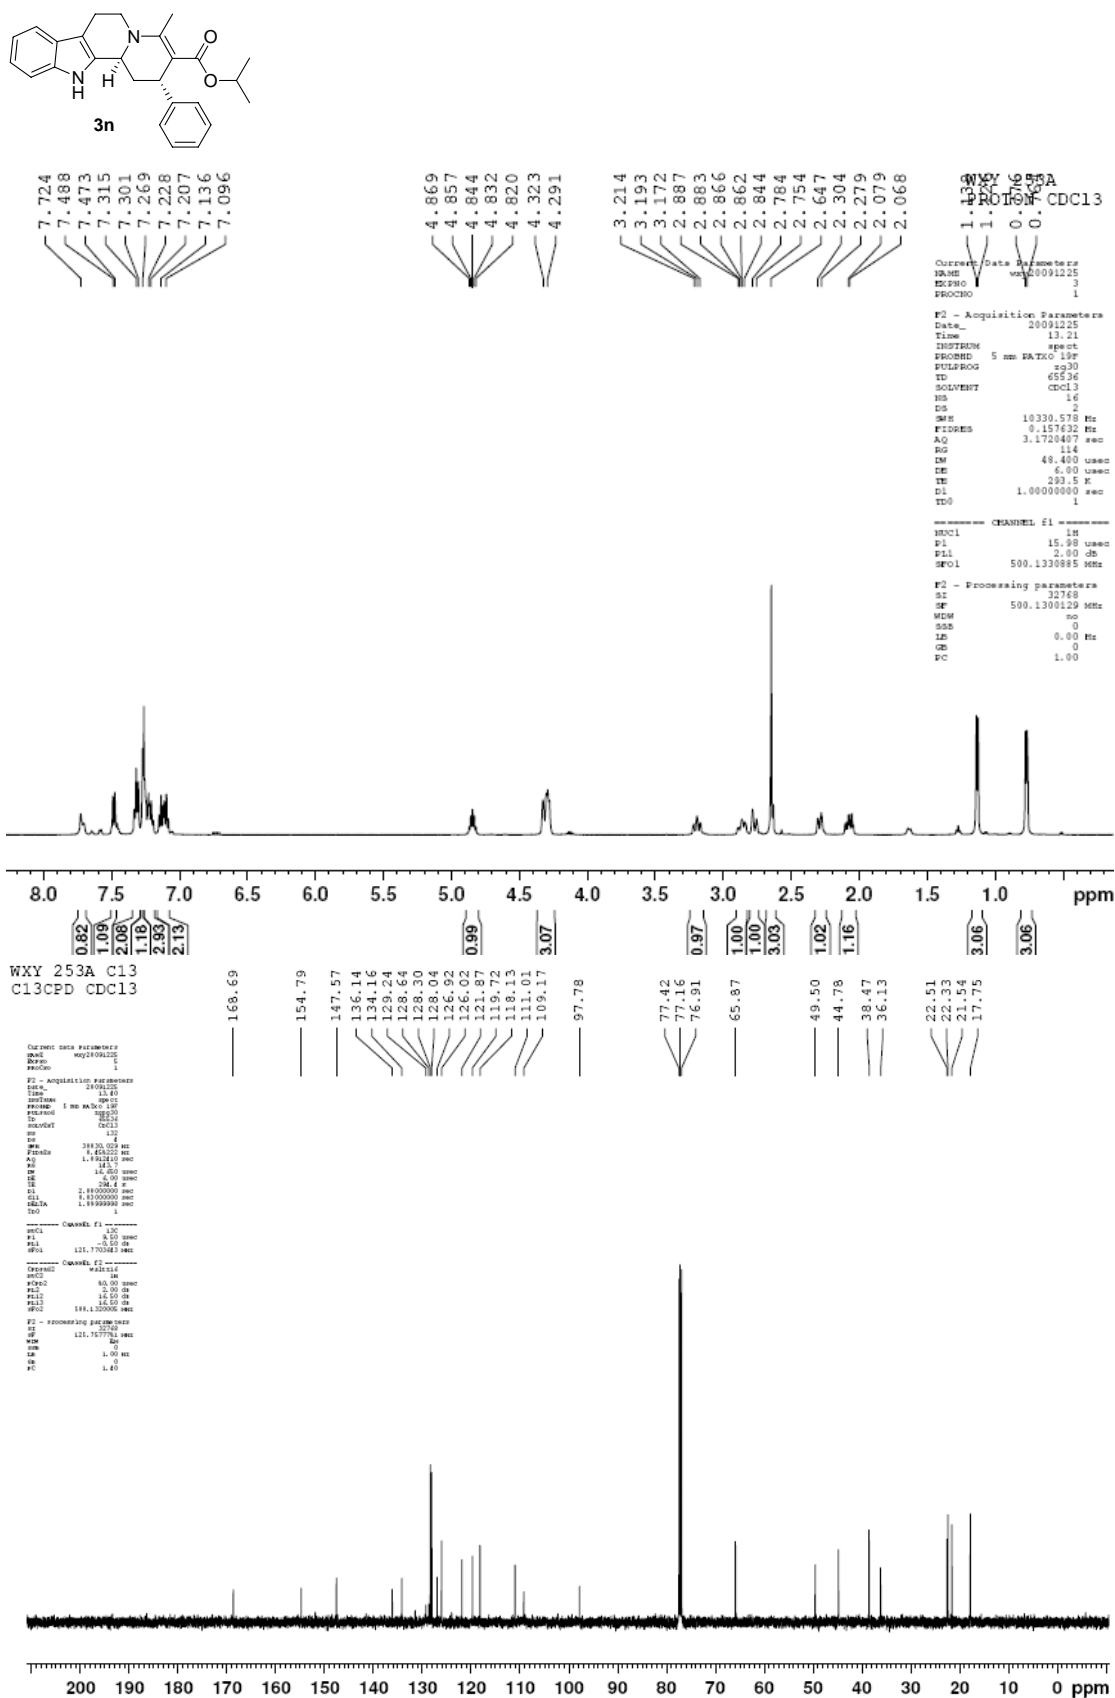

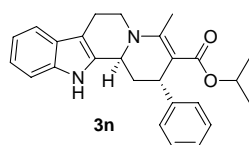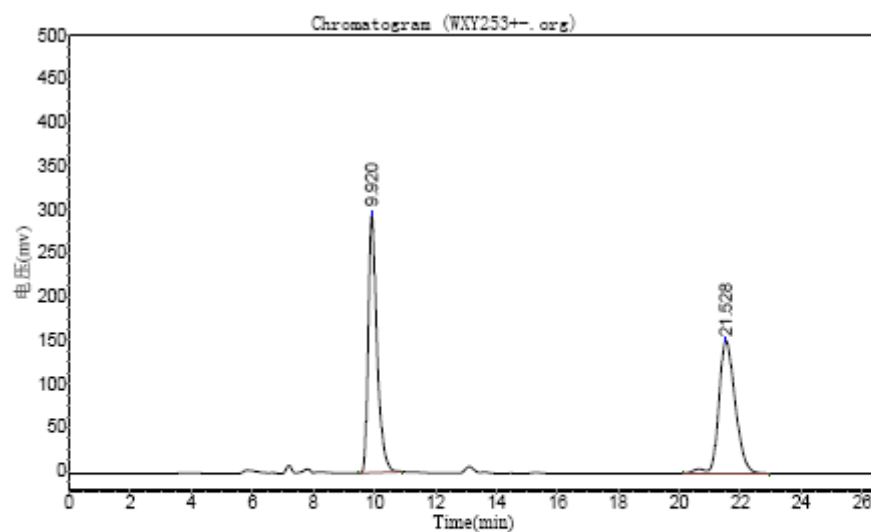

### Results

| Peak ID | Ret Time | Height     | Area         | Conc.    |
|---------|----------|------------|--------------|----------|
|         | 9.920    | 295421.375 | 5942029.500  | 50.7882  |
|         | 21.528   | 152728.734 | 5757605.500  | 49.2118  |
|         |          | 448150.109 | 11699635.000 | 100.0000 |

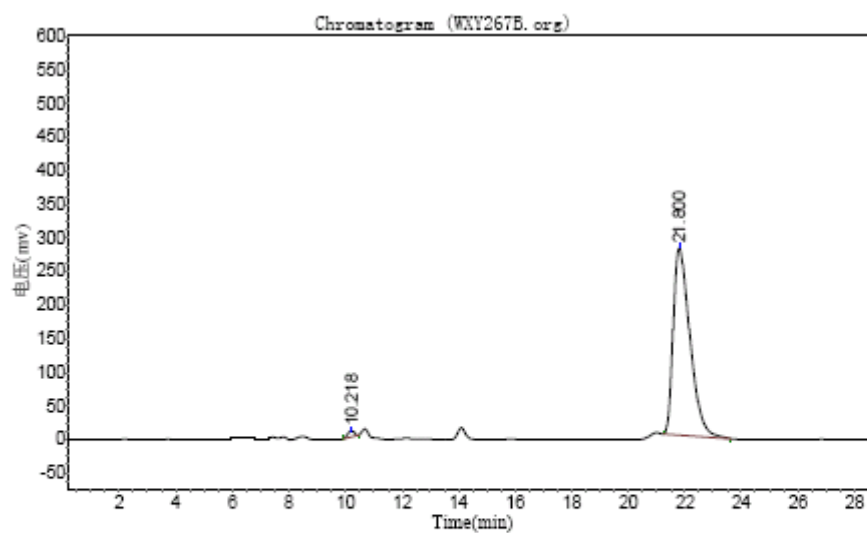

### Results

| Peak ID | Ret Time | Height     | Area         | Conc.    |
|---------|----------|------------|--------------|----------|
|         | 10.218   | 9253.499   | 146482.844   | 1.2600   |
|         | 21.800   | 278388.563 | 11479469.000 | 98.7400  |
|         |          | 287642.062 | 11625951.844 | 100.0000 |

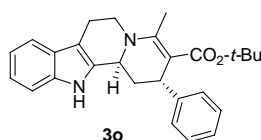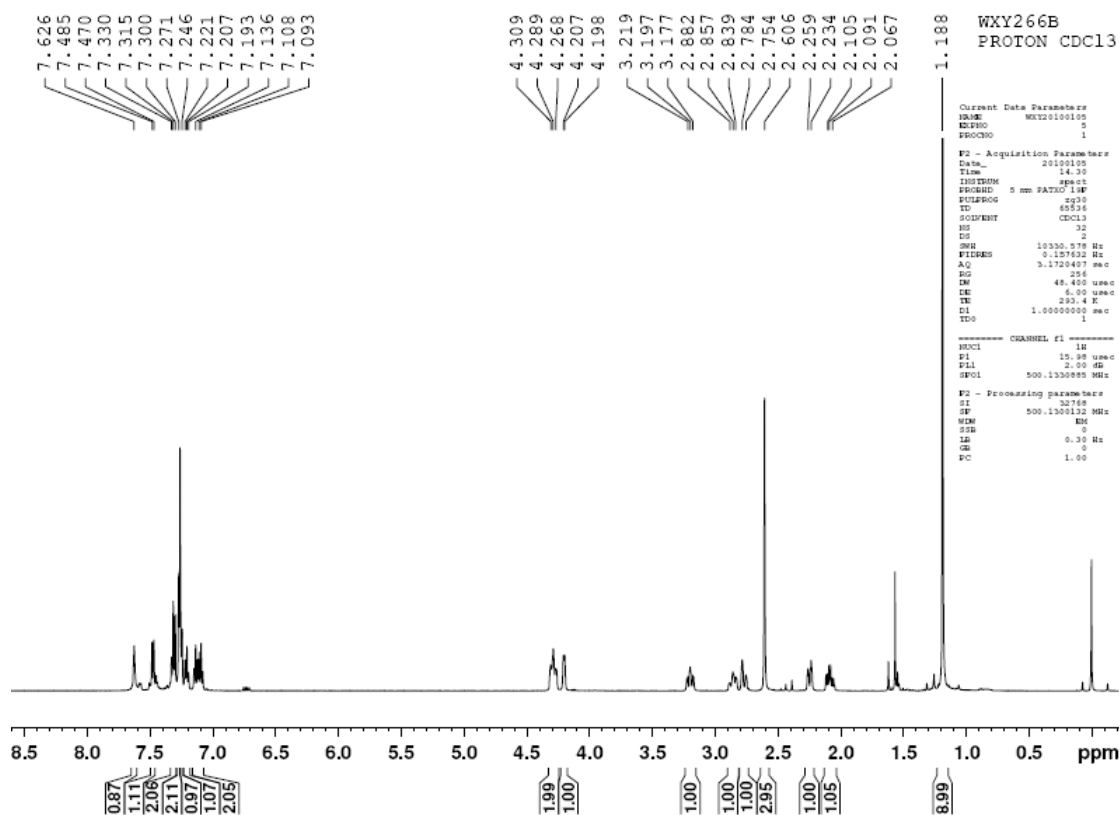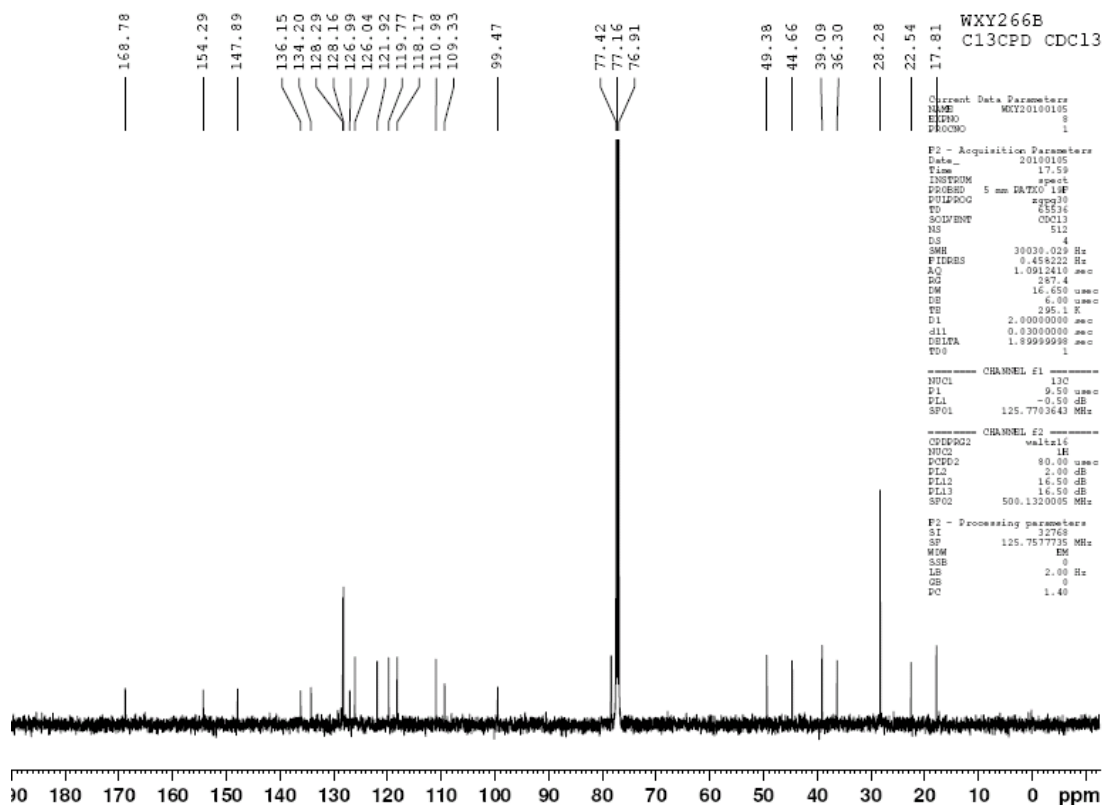

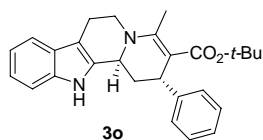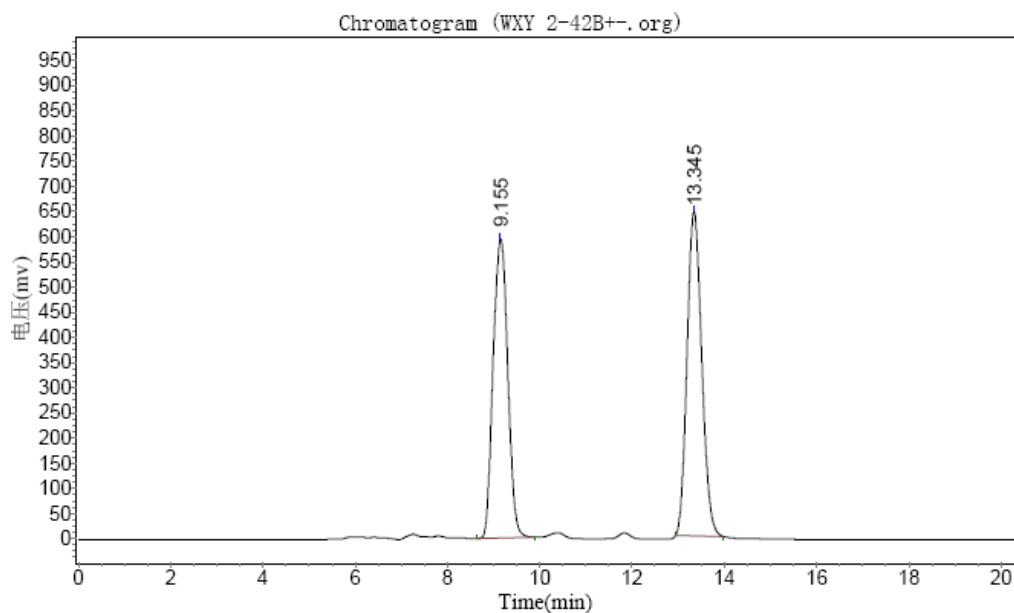

### Results

| Peak ID | Ret Time | Height      | Area         | Conc.    |
|---------|----------|-------------|--------------|----------|
|         | 9.155    | 593530.688  | 13087335.000 | 47.9745  |
|         | 13.345   | 644479.000  | 14192422.000 | 52.0255  |
|         |          | 1238009.688 | 27279757.000 | 100.0000 |

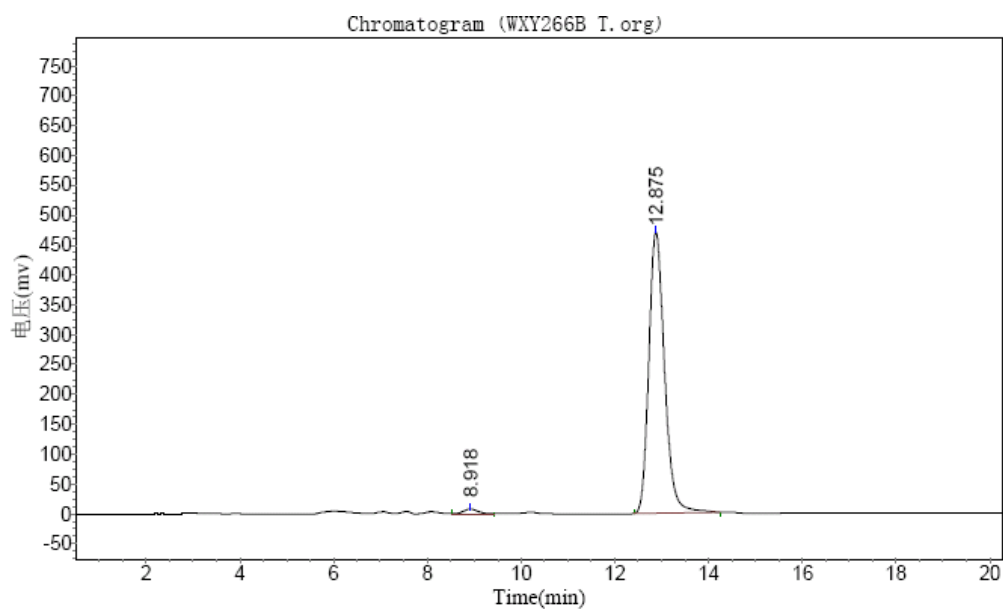

### Results

| Peak ID | Ret Time | Height     | Area         | Conc.    |
|---------|----------|------------|--------------|----------|
|         | 8.918    | 8485.617   | 185728.391   | 1.6671   |
|         | 12.875   | 470855.250 | 10955171.000 | 98.3329  |
|         |          | 479340.867 | 11140899.391 | 100.0000 |



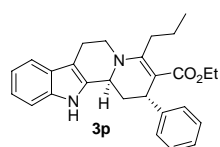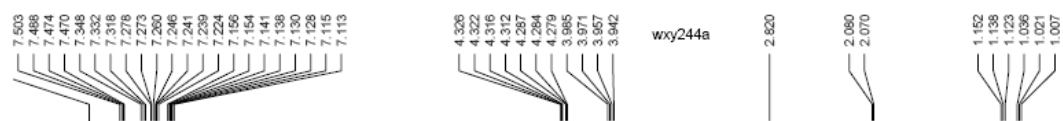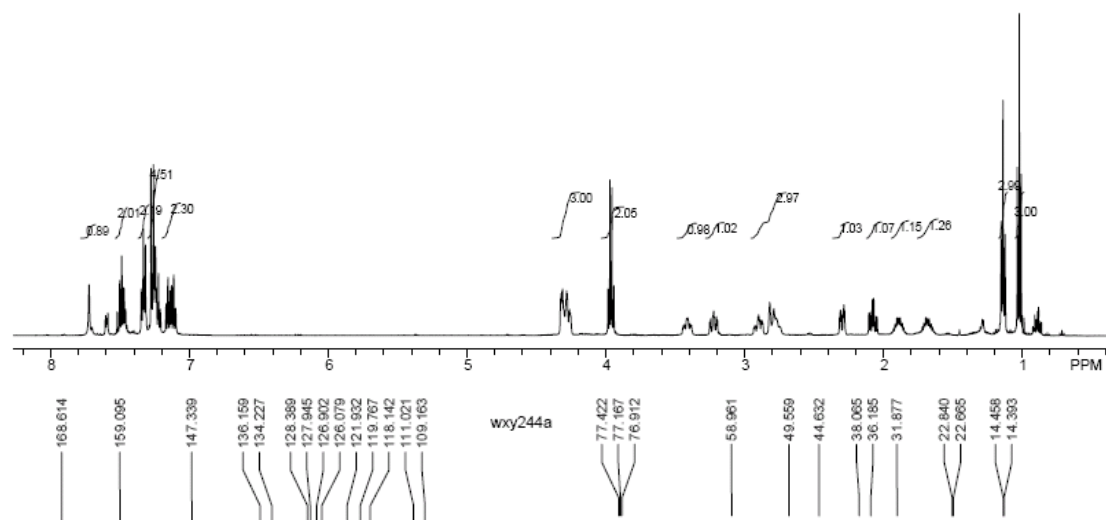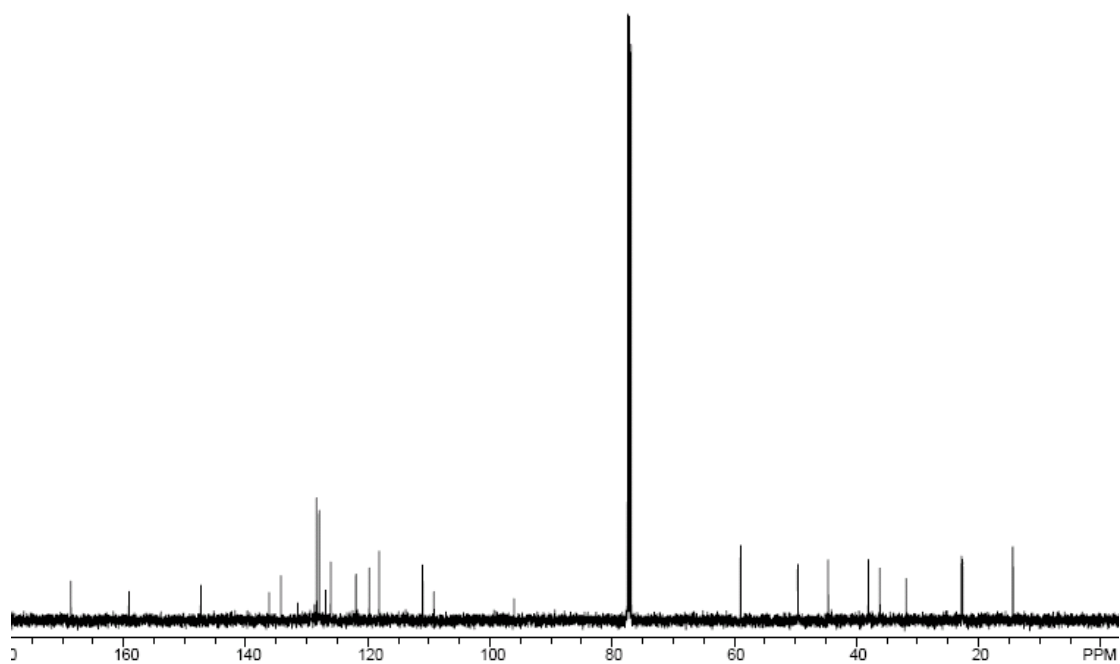

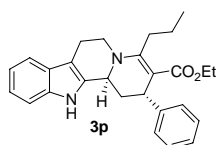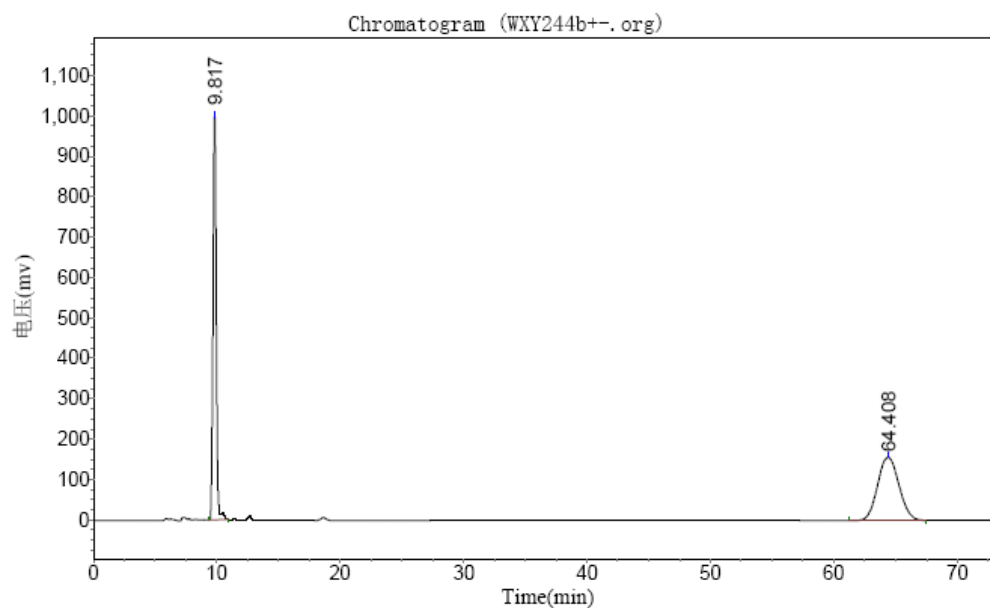

### Results

| Peak ID | Ret Time | Height      | Area         | Conc.    |
|---------|----------|-------------|--------------|----------|
|         | 9.817    | 997086.750  | 18544504.000 | 49.5718  |
|         | 64.408   | 156493.313  | 18864882.000 | 50.4282  |
|         |          | 1153580.063 | 37409386.000 | 100.0000 |

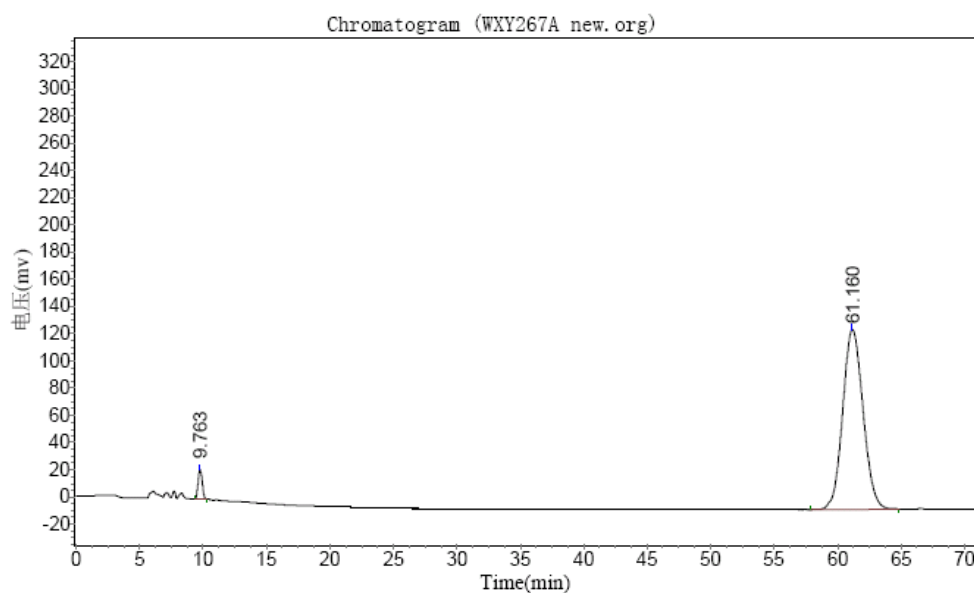

### Results

| Peak ID | Ret Time | Height     | Area         | Conc.    |
|---------|----------|------------|--------------|----------|
|         | 9.763    | 21432.580  | 481845.375   | 3.1625   |
|         | 61.160   | 132374.922 | 14754438.000 | 96.8375  |
|         |          | 153807.502 | 15236283.375 | 100.0000 |

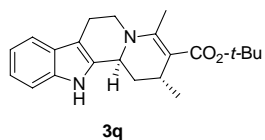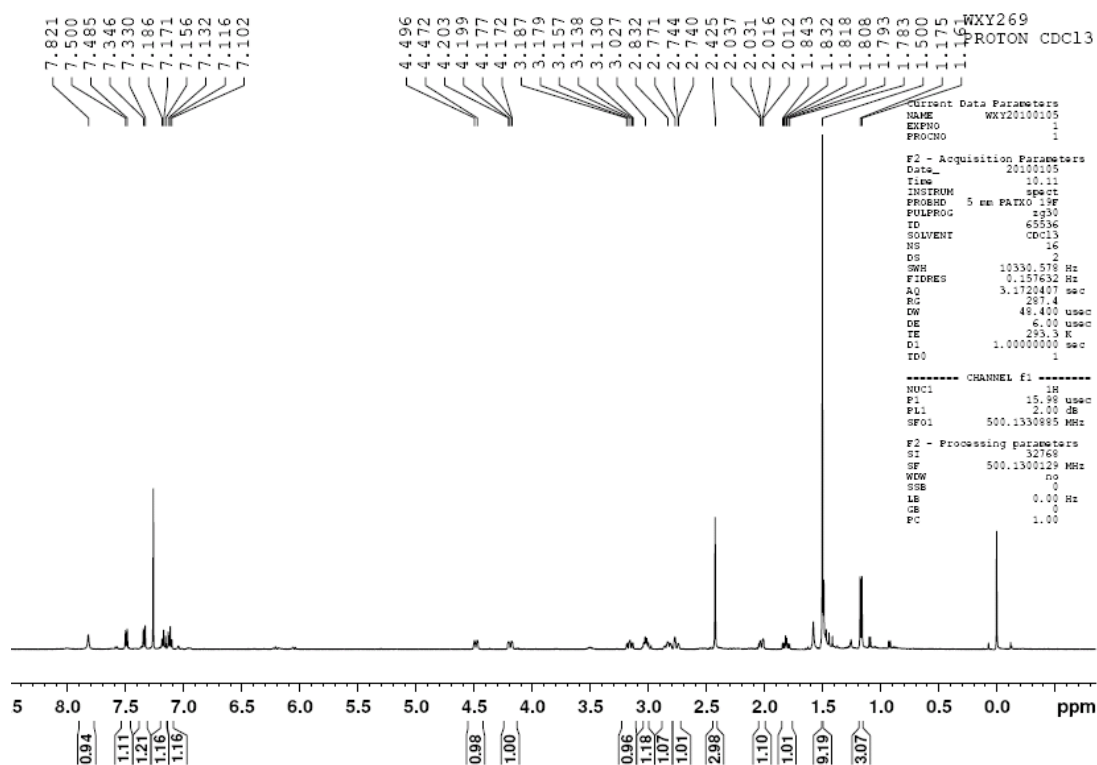

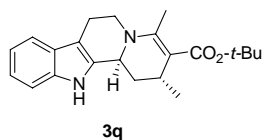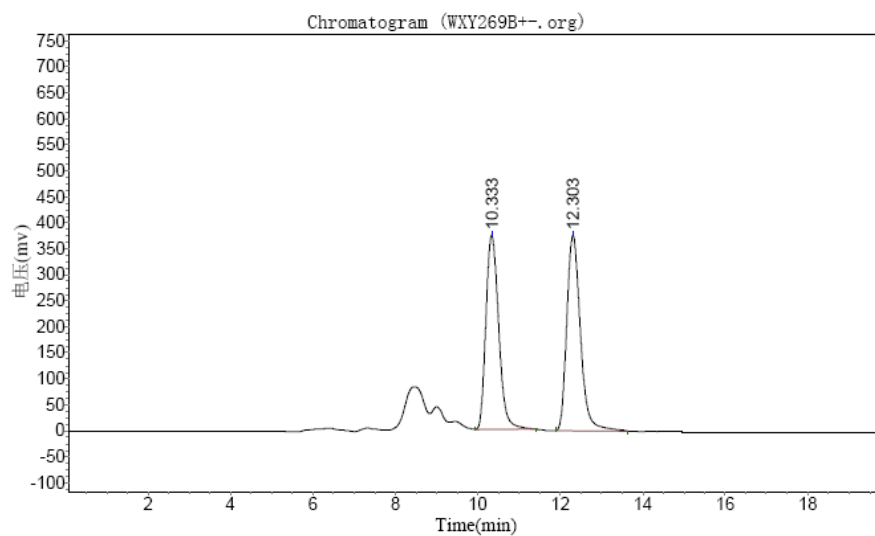

### Results

| Peak ID | Ret Time | Height     | Area         | Conc.    |
|---------|----------|------------|--------------|----------|
|         | 10.333   | 372825.344 | 8012541.500  | 48.1830  |
|         | 12.303   | 375958.688 | 8616841.000  | 51.8170  |
|         |          | 748784.031 | 16629382.500 | 100.0000 |

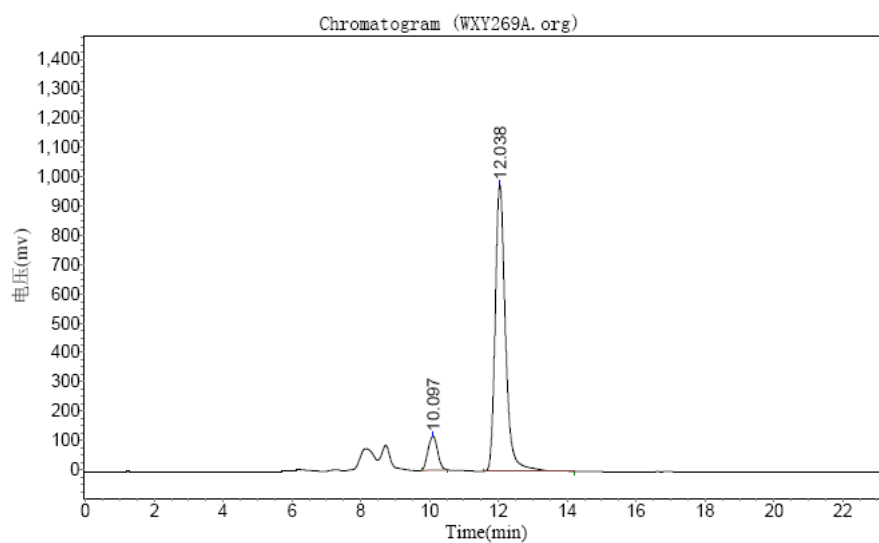

### Results

| Peak ID | Ret Time | Height      | Area         | Conc.    |
|---------|----------|-------------|--------------|----------|
|         | 10.097   | 115815.563  | 2228290.000  | 9.8723   |
|         | 12.038   | 979336.313  | 20342834.000 | 90.1277  |
|         |          | 1095151.875 | 22571124.000 | 100.0000 |
